# Supplementary material for: Investigation of the Association between Air Pollution and Non-Alcoholic Fatty Liver Disease in the European Population: A Mendelian Randomization Study
Source: MDPI journal article supplement (doi:10.3390/toxics12030228), 2024-03-21
Supplement: s1 [file s1]

## ***Supplementary Material***

### **Investigation of the association between air pollution and non-alcoholic fatty liver disease in the European population: a Mendelian randomization study**

**Jing Yang<sup>1†</sup>, Yaqi Zhang<sup>1†</sup>, Yin Yuan<sup>1,2†</sup>, Zhongyang Xie<sup>1</sup>, Lanjuan Li<sup>1\*</sup>**

**#These authors have contributed equally to this work and share first authorship**

**\* Correspondence: Corresponding Author: [ljli@zju.edu.cn](mailto:ljli@zju.edu.cn)**

#### **1 Supplementary Tables**

**Supplementary Table S1. Detailed information about exposure and outcome in the MR study.**

**Sheet1:** Detailed information about exposures in UK Biobank.

**Sheet2:** Diagnostic codes used for identification of NAFLD in the MR studies.

**Sheet3:** Analytical methods used in datasets of NAFLD in the MR studies.

**Notes:** PM, Particulate matter; UKB, United Kingdom Biobank; Std.dev, standard deviation; ICD9 / ICD10: International Classification of Diseases Ninth and Tenth Revisions; READ V2 and READ V3, Clinical terminology system used in UK Primary Care settings (created by Dr James Read); †All READ V2 Codes also apply to READ V3 Codes; eMERGE Network: electronic Medical Records and Genomics (eMERGE) Network.

**Supplementary Table S2. Characteristics of the genetic instrument variables for the air pollution on non-alcoholic fatty liver disease in the derivation dataset in the Mendelian randomization study at the genome-wide significance level ( $p < 1 \times 10^{-5}$ ).**

**Sheet1:** Characteristics of the genetic instrument variables for PM<sub>2.5</sub> on non-alcoholic fatty liver disease in the derivation dataset in the Mendelian randomization study at level  $p < 1 \times 10^{-5}$ .

**Sheet2:** Characteristics of the genetic instrument variables for PM<sub>2.5</sub> absorbance on non-alcoholic fatty liver disease in the derivation dataset in the Mendelian randomization study at level  $p < 1 \times 10^{-5}$ .

**Sheet3:** Characteristics of the genetic instrument variables for PM<sub>2.5-10</sub> on non-alcoholic fatty liver disease in the derivation dataset in the Mendelian randomization study at level  $p < 1 \times 10^{-5}$ .

**Sheet4:** Characteristics of the genetic instrument variables for PM<sub>10</sub> on non-alcoholic fatty liver disease in the derivation dataset in the Mendelian randomization study at level  $p < 1 \times 10^{-5}$ .

**Sheet5:** Characteristics of the genetic instrument variables for nitrogen dioxide on non-

alcoholic fatty liver disease in the derivation dataset in the Mendelian randomization study at level  $p < 1 \times 10^{-5}$ .

**Sheet6:** Characteristics of the genetic instrument variables for nitrogen oxides on non-alcoholic fatty liver disease in the derivation dataset in the Mendelian randomization study at level  $p < 1 \times 10^{-5}$ .

**Supplementary Table S3. Characteristics of the SNPs correlated with the confounding factors for NAFLD or NAFLD directly at genome-wide significance level ( $p < 1 \times 10^{-5}$ ).**

**Sheet1:** Characteristics of the SNPs as the genetic instrument variables for PM<sub>2.5</sub> correlated with the confounding factors for NAFLD or NAFLD directly at level  $P < 1 \times 10^{-5}$ .

**Sheet2:** Characteristics of the SNPs as the genetic instrument variables for PM<sub>2.5</sub> absorbance correlated with the confounding factors for NAFLD or NAFLD directly at level  $p < 1 \times 10^{-5}$ .

**Sheet3:** Characteristics of the SNPs as the genetic instrument variables for PM<sub>2.5-10</sub> correlated with the confounding factors for NAFLD or NAFLD directly at level  $p < 1 \times 10^{-5}$ .

**Sheet4:** Characteristics of the SNPs as the genetic instrument variables for PM<sub>10</sub> correlated with the confounding factors for NAFLD or NAFLD directly at level  $p < 1 \times 10^{-5}$ .

**Sheet5:** Characteristics of the SNPs as the genetic instrument variables for nitrogen dioxide correlated with the confounding factors for NAFLD or NAFLD directly at level  $p < 1 \times 10^{-5}$ .

**Sheet6:** Characteristics of the SNPs as the genetic instrument variables for nitrogen oxides correlated with the confounding factors for NAFLD or NAFLD directly at level  $p < 1 \times 10^{-5}$ .

**Supplementary Table S4. MR analytical results of air pollution on non-alcoholic fatty liver disease at different significance levels.**

**Sheet1:** MR original analytical results of air pollution on non-alcoholic fatty liver disease in the derivation dataset at level  $p < 5 \times 10^{-8}$ .

**Sheet2:** MR analytical results of air pollution on non-alcoholic fatty liver disease in the derivation dataset at level  $p < 5 \times 10^{-8}$  without SNPs in Table S2.

**Sheet3:** MR original analytical results of air pollution on non-alcoholic fatty liver disease in the derivation dataset at level  $p < 1 \times 10^{-6}$ .

**Sheet4:** MR analytical results of air pollution on non-alcoholic fatty liver disease in the derivation dataset at level  $p < 1 \times 10^{-6}$  without SNPs in Table S2.

**Sheet5:** MR original analytical results of air pollution on non-alcoholic fatty liver disease in the derivation dataset at level  $p < 1 \times 10^{-5}$ .

**Sheet6:** MR analytical results of air pollution on non-alcoholic fatty liver disease in the derivation dataset at level  $p < 1 \times 10^{-5}$  without SNPs in Table S2.

**Sheet7:** Bias, Type 1 error rate for Mendelian randomization with sample overlap and power in the derivation dataset.

**Sheet8:** MR analytical results of air pollution on non-alcoholic fatty liver disease in the validation datasets at level  $p < 1 \times 10^{-5}$  without SNPs in Table S2.

**Notes:**

IVW-mre:Inverse variance weighted-multiplicative random effects; MR-RAPS:Mendelian Randomization-Robust Adjusted Profile Score; MR-PRESSO:Mendelian Randomization-Pleiotropy RESidual Sum and Outlier; OR:odds ratio; OR\_low: The lower of 95% confidence interval of OR; OR\_up: The upper of 95% confidence interval of OR; NA:Not available.

## **2 STROBE-MR checklist**

Strengthening observational studies using Mendelian randomization (STROBE-MR) checklist.
