# Supplementary material for: Investigation of the Association between Air Pollution and Non-Alcoholic Fatty Liver Disease in the European Population: A Mendelian Randomization Study
Source: Toxics. 2024 Mar 21;12(3):228. doi: 10.3390/toxics12030228 (PMC10974773; doi:10.3390/toxics12030228)
Supplement: Supplementary file 1 [file toxics-12-00228-s001.zip]

Archive with 6 entries (6 files):
- STROBE-MR checklist.pdf
- Supplementary Material.pdf
- TABLE S1.xlsx
- TABLE S2.xlsx
- TABLE S3.xlsx
- TABLE S4.xlsx
