# Supplementary material for: Investigation of the Association between Air Pollution and Non-Alcoholic Fatty Liver Disease in the European Population: A Mendelian Randomization Study
Source: Toxics. 2024 Mar 21;12(3):228. doi: 10.3390/toxics12030228 (PMC10974773; doi:10.3390/toxics12030228)
Supplement: Supplementary file 1 [file toxics-12-00228-s001.zip › TABLE S1.xlsx]

## Sheet: Sheet1
Detailed information about exposures in UK Biobank
Exposure	PM2.5	PM2.5 absorbance	PM2.5-10	PM10	Nitrogen dioxide	Nitrogen oxides
Value type	continious	continious	continious	continious	continious	continious
Unit	micro-g/m3	per-metre	micro-g/m3	micro-g/m3	micro-g/m3	micro-g/m3
Sexed	both sexes	both sexes	both sexes	both sexes	both sexes	both sexes
UKB data-field	24006	24007	24008	24005	24003	24004
Participants size	461060	461060	461060	461060	494979	494979
Mean	9.99192	1.18649	6.42827	16.2377	26.7134	44.112
Std.dev	1.057	0.270898	0.90063	1.89912	7.57588	15.5324
Maximum	21.31	4.6	12.82	31.39	108.49	265.94
Decile 9	11.31	1.52	7.64	18.7	36.01	61.52
Decile 8	10.75	1.35	6.83	17.36	32.49	53.22
Decile 7	10.41	1.26	6.5	16.73	30.15	48.77
Decile 6	10.16	1.19	6.27	16.33	28.18	45.43
Median	9.93	1.13	6.11	16.03	26.25	42.43
Decile 4	9.7	1.07	5.99	15.77	24.43	39.43
Decile 3	9.44	1.02	5.89	15.49	22.53	36.24
Decile 2	9.12	0.97	5.8	14.96	20.3	32.34
Decile 1	8.65	0.91	5.69	14.15	17.26	26.69
Minimum	8.17	0.83	5.57	11.78	12.93	19.74
Notes: PM, Particulate matter; UKB, UK Biobank; Std.dev,standard deviation.

## Sheet: Sheet2
Diagnostic codes used for identification of NAFLD in the MR studies
Diagnosis	GWAS ID	Consortium/Cohort	Case/Control	ICD10	ICD9	READ V2 Code	Additional READ V3 Codes†
Non-alcoholic Fatty Liver Disease	ebi-a-GCST90054782	UKB	4761/373227	K75.8, K76.0	571.5	C32y5, J6154, J61y1, J61y7, J61y8, J61y9	X307v, XaQIT
Non-alcoholic Fatty Liver Disease	ebi-a-GCST90091033	eMERGE Network	1106/8571	K75.81, K76.0, and K76.9	571.5, 571.8, 571.9
Non-alcoholic Fatty Liver Disease	ebi-a-GCST90091033	UKB	2558/395241	K74.0, K74.2, K75.8, K76.0, and K76.9
Non-alcoholic Fatty Liver Disease	ebi-a-GCST90091033	Estonian Biobank	4119/190120	K74.0, K74.2, K75.8, K76.0, and K76.9
Non-alcoholic Fatty Liver Disease	ebi-a-GCST90091033	FinnGen	651/176248	K76.0
Non-alcoholic Fatty Liver Disease	finn-b-NAFLD	FinnGen	894/217898	K76.0
Notes:
ICD9 / ICD10: International Classification of Diseases Ninth and Tenth Revisions
READ V2 and READ V3: Clinical terminology system used in UK Primary Care settings (created by Dr James Read)
†All READ V2 Codes also apply to READ V3 Codes
UKB：United Kingdom Biobank
eMERGE Network：electronic Medical Records and Genomics Network

## Sheet: Sheet13
Analytical methods used in datasets of NAFLD in the MR studies
Diagnosis	GWAS ID	Consortium/Cohort	Analytical methods of data
Non-alcoholic Fatty Liver Disease	ebi-a-GCST90054782	UKB	GWAS was adjusted for age, gender, the first 20 genetic principal components
Non-alcoholic Fatty Liver Disease	ebi-a-GCST90091033	eMERGE Network	GWAS was adjusted for age, gender,body mass index, genotyping site and the first three ancestry based principal components
Non-alcoholic Fatty Liver Disease	ebi-a-GCST90091033	UKB	GWAS was adjusted for age, gender and the 10-main ancestry-based principal components
Non-alcoholic Fatty Liver Disease	ebi-a-GCST90091033	Estonian Biobank	GWAS was adjusted for age, gender and the 10-main ancestry-based principal components
Non-alcoholic Fatty Liver Disease	ebi-a-GCST90091033	FinnGen	GWAS was adjusted for age, gender and the 10-main ancestry-based principal components
Non-alcoholic Fatty Liver Disease	finn-b-NAFLD	FinnGen	——
Notes:UKB,United Kingdom Biobank.
