# Supplementary material for: Investigation of the Association between Air Pollution and Non-Alcoholic Fatty Liver Disease in the European Population: A Mendelian Randomization Study
Source: Toxics. 2024 Mar 21;12(3):228. doi: 10.3390/toxics12030228 (PMC10974773; doi:10.3390/toxics12030228)
Supplement: Supplementary file 1 [file toxics-12-00228-s001.zip › TABLE S2.xlsx]

## Sheet: PM2.5
Characteristics of the genetic instrument variables for PM2.5 on non-alcoholic fatty liver disease in the derivation dataset in the Mendelian randomization study at level p < 1E-5
SNP	chr	pos	effect_allele.exposure	other_allele.exposure	beta.exposure	se.exposure	pval.exposure	beta.outcome	se.outcome	pval.outcome	F statistics
rs10203969	2	217485550	T	G	-0.0103116	0.00226955	5.49997e-06	-0.0301562	0.0219002	0.222653	20.643
rs10786736	10	104849116	C	G	0.0158126	0.00357148	9.49992e-06	-0.0416765	0.0350699	0.21812	19.6024
rs10961167	9	13603291	A	G	-0.0193433	0.00406633	2e-06	0.0240778	0.0365471	0.503242	22.6285
rs11042316	11	2051631	A	G	-0.0130416	0.00249815	1.79999e-07	0.0276638	0.0234434	0.180652	27.2537
rs11075636	16	66511627	G	A	-0.0130969	0.00294762	8.9e-06	-0.0327453	0.0283884	0.308322	19.7421
rs11209977	1	41851583	G	A	0.013974	0.00314514	8.9e-06	-0.017657	0.0297546	0.390322	19.7407
rs114708313	6	31329004	T	A	0.024558	0.00447797	4.20001e-08	0.123288	0.0405226	0.00293299	30.0762
rs11610713	12	107938815	T	A	0.0379698	0.00806561	2.5e-06	-0.0746675	0.0788521	0.357693	22.1617
rs11616726	13	75244132	G	T	-0.0176545	0.0039758	8.99995e-06	-0.0212451	0.0380013	0.596267	19.718
rs116259394	4	92144497	G	A	-0.0349116	0.00784055	8.50002e-06	-0.0964558	0.0770896	0.182221	19.8265
rs116925111	8	93266536	G	T	0.0533208	0.0108609	9.09997e-07	0.0981969	0.0957326	0.325396	24.1025
rs1172955	10	97877320	A	T	0.0107361	0.0023684	5.80003e-06	0.0332879	0.0226409	0.19745	20.5486
rs117366154	22	43993871	T	C	-0.0193314	0.00427977	6.29999e-06	-0.0225013	0.0413585	0.614002	20.4026
rs117878224	22	18475815	G	A	-0.0480395	0.0100662	1.79999e-06	0.0562953	0.0944331	0.507854	22.7754
rs1182891	7	75245569	T	G	0.0127384	0.0027732	4.39997e-06	-0.0091901	0.0265846	0.717092	21.0993
rs11855821	15	78008843	A	G	-0.0126249	0.00243151	2.1e-07	-0.0347861	0.0230368	0.195537	26.959
rs12133063	1	91214714	A	C	0.0104397	0.00226473	4e-06	0.01545	0.0216394	0.468696	21.2492
rs1217106	8	64567670	G	A	0.012725	0.00262039	1.2e-06	0.0102077	0.0249733	0.698779	23.5822
rs12812511	12	62341242	G	A	0.0111409	0.00239094	3.2e-06	0.00740253	0.0227898	0.614977	21.7122
rs13035717	2	181688436	T	A	-0.0130553	0.00284989	4.60002e-06	-0.0283316	0.0273666	0.439907	20.9854
rs1318845	4	153001662	C	T	-0.0139685	0.0026994	2.30001e-07	0.0504364	0.0253287	0.0375448	26.7772
rs1340247	9	4071868	A	G	-0.00993907	0.00221153	7.00003e-06	-0.0336788	0.0212839	0.170045	20.1979
rs13429081	2	185963522	T	A	0.0136465	0.00277736	8.9e-07	0.029151	0.0262743	0.329278	24.1423
rs1372504	5	103749428	A	G	0.0122914	0.00221931	3.09999e-08	0.0143762	0.021286	0.495867	30.6737
rs138685951	20	19608556	T	C	-0.0308152	0.00678627	5.60003e-06	-0.0995651	0.0666369	0.15819	20.619
rs140500108	12	124746011	G	C	-0.0221695	0.00487103	5.30005e-06	-0.0310057	0.0453268	0.453374	20.7143
rs147392452	17	5299093	T	C	-0.0281972	0.00633332	8.50002e-06	-0.0109892	0.0597104	0.832548	19.8221
rs151323121	15	45569270	A	G	-0.0415962	0.00919978	6.1e-06	0.0469504	0.0823823	0.553448	20.4434
rs1537371	9	22099568	A	C	0.0123705	0.00214859	8.50002e-09	0.00716428	0.0206251	0.758387	33.1488
rs16957755	16	82610053	C	T	0.0216856	0.00438434	7.59994e-07	-0.0295699	0.0426887	0.454528	24.4644
rs17070492	8	2420855	G	C	0.0168879	0.00361675	2.99999e-06	-0.0182913	0.0347886	0.598368	21.8029
rs17103928	14	76507299	A	C	-0.0139275	0.00300906	3.69999e-06	0.0291704	0.0286264	0.347666	21.4232
rs17183854	18	3100049	G	T	-0.0434289	0.00942022	4e-06	0.0785431	0.0873328	0.321973	21.2538
rs17657881	7	17757841	C	T	-0.0371072	0.00804635	4e-06	0.0263498	0.0759506	0.60616	21.2676
rs1933805	6	105353475	A	G	0.00960125	0.00216708	9.40005e-06	0.00671739	0.0206925	0.791963	19.6293
rs2091322	7	143019776	C	T	-0.00977991	0.00220058	8.79995e-06	-0.0178819	0.0210393	0.492766	19.7513
rs2141531	7	9253413	G	T	-0.0114166	0.00235647	1.29999e-06	-0.0400327	0.0227512	0.103932	23.472
rs2278801	18	77209015	G	A	0.0102411	0.00226818	6.29999e-06	0.00344406	0.0217003	0.912437	20.3863
rs2292156	16	49765133	T	G	0.0146809	0.0028777	3.40001e-07	0.00364335	0.0275524	0.84165	26.0264
rs2324898	6	86968841	T	C	0.0101074	0.00225624	7.49998e-06	0.00694582	0.0215386	0.804683	20.0682
rs27152	5	153734582	T	C	-0.0107288	0.00230502	3.2e-06	0.0225146	0.0219252	0.242537	21.6647
rs35703574	11	61439682	A	G	-0.0246758	0.00534513	3.89996e-06	-0.0901031	0.0490281	0.0475499	21.3121
rs45485691	4	123475979	A	G	-0.0108382	0.00241442	7.19996e-06	-0.00757764	0.0231354	0.935272	20.1506
rs4854523	2	69051853	G	A	0.0134447	0.0028931	3.40001e-06	-0.0252491	0.0276064	0.408083	21.5961
rs487230	1	55541174	G	A	-0.0116357	0.00251245	3.59998e-06	0.0146521	0.0242135	0.481747	21.4482
rs4926311	19	13847573	T	C	-0.0103655	0.00232466	8.19993e-06	-0.00378515	0.022236	0.815671	19.8821
rs4933236	10	94498436	C	T	0.0100096	0.00220235	5.49997e-06	0.0380084	0.0210723	0.0664645	20.6567
rs56068671	6	50597378	T	G	-0.0181851	0.00392582	3.59998e-06	-0.0385278	0.0379477	0.326316	21.4571
rs56181709	2	77268743	T	C	-0.011646	0.00259266	7.10003e-06	0.028257	0.0247214	0.194982	20.1773
rs58824859	5	137976541	C	A	0.0120084	0.00230502	1.89998e-07	0.0345367	0.0213285	0.100829	27.1407
rs6024877	20	55014008	C	T	0.024387	0.00551143	9.69996e-06	-0.025083	0.0537517	0.575201	19.5789
rs62119705	19	2279746	T	C	0.0111347	0.00226543	8.9e-07	0.0293258	0.0217938	0.21754	24.1577
rs62180462	2	200815608	A	G	-0.0351148	0.00762753	4.20001e-06	-0.041147	0.0715377	0.662223	21.194
rs62368672	5	80861930	C	T	-0.0181174	0.00392946	4e-06	0.046874	0.0364773	0.157098	21.2582
rs62484669	7	104872861	A	G	0.0178158	0.00362056	8.60003e-07	0.0702441	0.0337707	0.0440961	24.2136
rs628913	11	88663856	T	C	-0.00992826	0.00218189	5.39995e-06	-0.0541648	0.0208385	0.0211948	20.7053
rs6432776	2	164785611	C	T	0.0114362	0.00238615	1.6e-06	0.00595225	0.0229676	0.860817	22.9704
rs6547952	2	22045642	G	T	-0.0110872	0.00228323	1.2e-06	-0.00318607	0.0215625	0.929877	23.58
rs656813	15	47671487	C	T	-0.0140311	0.00315827	8.9e-06	-0.00951311	0.0302274	0.838457	19.7372
rs66501886	3	67412449	G	C	-0.0102486	0.0023149	9.49992e-06	-0.00672959	0.0222358	0.752406	19.6004
rs6667345	1	8197477	T	C	0.011551	0.00256219	6.49995e-06	0.0263498	0.0230985	0.324855	20.3243
rs6749467	2	343517	A	G	-0.0123919	0.00218282	1.40001e-08	-0.026804	0.0206934	0.240712	32.2285
rs6937315	6	139196861	C	T	0.0101788	0.002252	6.19998e-06	0.0273525	0.0214219	0.177748	20.4294
rs6960011	7	90302199	G	A	-0.0105236	0.00227496	3.69999e-06	-0.0340905	0.021838	0.1651	21.3984
rs7093269	10	3458842	A	T	0.179809	0.0403199	8.19993e-06	-0.0096484	0.0270775	0.77136	19.8877
rs718059	14	34234984	A	G	-0.0135133	0.00294347	4.39997e-06	-0.0191196	0.027888	0.493207	21.0767
rs72655898	13	112082676	G	A	-0.0113177	0.00239801	2.39999e-06	0.0286458	0.0226579	0.14445	22.2748
rs72700006	14	104709808	C	T	0.02003	0.00424579	2.39999e-06	0.0278389	0.0389173	0.49102	22.2559
rs72805044	2	39974034	C	T	-0.0373495	0.00834625	7.59994e-06	-0.0189392	0.0809789	0.851463	20.0257
rs72808024	5	164479164	C	A	-0.0160909	0.00302016	9.90011e-08	-0.00288616	0.0288231	0.985402	28.3858
rs7514956	1	74019696	C	A	-0.0129805	0.00276012	2.59998e-06	-0.00512712	0.0264533	0.849747	22.117
rs75730485	6	147230949	C	T	-0.0267661	0.00605269	9.80009e-06	-0.0503274	0.0587406	0.48153	19.5557
rs7573056	2	58229428	C	A	-0.0114094	0.00217008	1.5e-07	-0.0163936	0.0207931	0.482615	27.6423
rs75738250	3	194880839	A	T	0.0133372	0.00293962	5.69994e-06	-0.0301871	0.0273224	0.259513	20.5848
rs76230173	15	29583554	A	G	-0.0208412	0.00465512	7.59994e-06	-0.0286958	0.0421073	0.561796	20.044
rs77205736	8	10153460	T	C	0.0135219	0.00241312	2.1e-08	-0.0273589	0.023256	0.24121	31.3991
rs77255816	6	20833602	T	C	0.0313937	0.00572778	4.20001e-08	0.0674811	0.0533183	0.26179	30.0409
rs7750418	6	139679150	G	T	0.0103658	0.00230435	6.80002e-06	0.00754149	0.0219919	0.916263	20.2353
rs7776279	6	163999770	A	G	0.0109471	0.00238522	4.39997e-06	0.0441796	0.0230213	0.0498322	21.064
rs77962859	15	57671800	C	T	-0.015754	0.00351359	7.29995e-06	-0.0115616	0.0340514	0.838095	20.1039
rs78230389	8	35010055	G	A	-0.0467891	0.00948467	8.09991e-07	0.0127583	0.0896527	0.850201	24.3358
rs78467598	14	24141160	G	C	-0.0380022	0.00768566	7.59994e-07	-0.0622616	0.0699111	0.356643	24.4487
rs78539764	12	12490981	C	T	-0.0335181	0.0065901	3.69999e-07	0.0216245	0.0617539	0.658705	25.8687
rs79004040	20	35024526	G	C	-0.0322282	0.00725364	8.9e-06	0.0157848	0.0689581	0.731215	19.7406
rs7910200	10	15981388	T	C	-0.00982428	0.00217522	6.29999e-06	0.0288887	0.0208238	0.139239	20.3984
rs79229868	3	122425843	A	G	0.0445477	0.00994628	7.49998e-06	-0.0907358	0.0993594	0.307701	20.0599
rs800507	8	116796539	T	G	0.0112127	0.00253586	9.80009e-06	0.0145831	0.0242966	0.630803	19.551
rs80123875	3	148486829	T	G	-0.0187398	0.00386726	1.29999e-06	0.00410158	0.0354412	0.859902	23.4814
rs80347400	17	46012502	G	A	0.0137267	0.00303441	6.1e-06	-0.000519135	0.0287747	0.96732	20.4637
rs8614	17	27588806	A	C	0.0130804	0.00278984	2.80001e-06	-0.0226445	0.0269215	0.381805	21.9828
rs875982	11	130903061	T	C	-0.010045	0.00221461	5.69994e-06	-0.0286454	0.0209732	0.175564	20.5734
rs9260734	6	29932666	A	G	0.0139827	0.0029999	3.09999e-06	0.000659782	0.0289205	0.969482	21.7254
rs9644485	8	138230163	C	T	0.00986771	0.00215925	4.90004e-06	0.00573353	0.0206443	0.808708	20.8846
rs987204	3	94242461	A	G	0.0102987	0.00216741	2e-06	-9.40044e-05	0.0207792	0.998683	22.5779

## Sheet: PM2.5absorbance
Characteristics of the genetic instrument variables for PM2.5 absorbance on non-alcoholic fatty liver disease in the derivation dataset in the Mendelian randomization study at level p < 1E-5
SNP	chr	pos	effect_allele.exposure	other_allele.exposure	beta.exposure	se.exposure	pval.exposure	beta.outcome	se.outcome	pval.outcome	F statistics
rs10277233	7	147986419	A	G	0.0113617	0.00213653	1e-07	-0.0132626	0.0206525	0.49392	28.2793
rs10810975	9	18519313	A	G	0.0111531	0.00215283	2.19999e-07	0.0270897	0.0206841	0.159861	26.8393
rs10813259	9	30467137	G	A	0.0112544	0.00246363	4.90004e-06	0.000659782	0.0237637	0.913678	20.8686
rs10987740	9	130562464	A	G	-0.00992378	0.00216504	4.60002e-06	0.00894983	0.0209289	0.693202	21.0098
rs11050937	12	30668771	A	G	0.0232829	0.00495972	2.69998e-06	0.0348458	0.0475622	0.492767	22.0374
rs1105224	9	126127998	G	A	-0.0103106	0.00218208	2.30001e-06	-0.0347768	0.0210539	0.0874057	22.3268
rs11057475	12	124661746	G	A	-0.0111729	0.00239812	3.2e-06	0.00253678	0.0232049	0.914195	21.7065
rs112917479	1	168773021	T	A	0.0228665	0.00481097	2e-06	0.0139621	0.0456017	0.7563	22.5909
rs114727527	2	45053228	T	A	-0.0455866	0.00978664	3.2e-06	0.0646635	0.0880591	0.5541	21.6974
rs1152573	14	62261325	G	A	0.0111588	0.00248078	6.90001e-06	-0.00235978	0.0232269	0.885059	20.2329
rs11561942	7	115666379	T	C	0.0130172	0.00286157	5.39995e-06	0.0106036	0.0274046	0.673574	20.6931
rs116777534	2	227275772	T	C	-0.0338912	0.00765249	9.49992e-06	0.0653757	0.0710851	0.288734	19.6141
rs117698726	16	80542234	A	G	-0.0247742	0.00521286	2e-06	-0.01322	0.0501183	0.789454	22.5864
rs1178424	6	151118800	A	G	-0.0308566	0.00664266	3.40001e-06	0.015893	0.0601503	0.785623	21.578
rs12107253	3	139835374	T	A	0.0110534	0.00248981	8.99995e-06	-0.00500852	0.0234678	0.850252	19.7088
rs12131880	1	73997885	C	T	-0.0123311	0.00273536	6.49995e-06	-0.00245802	0.0264191	0.927886	20.3224
rs12325133	16	73186715	A	G	0.0399698	0.00902853	9.59997e-06	0.039413	0.0866502	0.685259	19.5988
rs12543723	8	138056924	G	A	-0.0199298	0.0042784	3.2e-06	0.00495769	0.0411579	0.820238	21.6992
rs12546218	8	62059751	T	C	0.0323494	0.00693203	3.09999e-06	-0.108539	0.0716998	0.104487	21.7777
rs12652703	5	178724795	C	G	0.0129713	0.00287329	6.29999e-06	-0.00743255	0.0278681	0.824966	20.3802
rs12798860	11	103732993	T	A	0.0240308	0.00511127	2.59998e-06	0.0624676	0.0485379	0.146908	22.1044
rs13181264	5	3767600	A	T	0.00959234	0.00214181	7.49998e-06	-0.0168473	0.0206327	0.442292	20.058
rs1336932	13	57553346	A	G	0.0110786	0.00237601	3.09999e-06	0.0229643	0.023013	0.338313	21.7407
rs1340900	13	75617619	A	G	0.010593	0.00216486	9.90011e-07	-0.0318426	0.0208732	0.111813	23.943
rs138171657	19	24094234	A	C	-0.0326748	0.00670904	1.09999e-06	-0.00470606	0.0627438	0.881781	23.7195
rs139346310	5	164467577	A	G	-0.015657	0.0030914	4.09996e-07	-0.00527991	0.0296671	0.941051	25.6511
rs140418176	4	60425653	A	C	-0.0380012	0.00831541	4.90004e-06	0.00864254	0.0790586	0.86284	20.8847
rs140465769	6	115934820	T	C	-0.0503994	0.0102477	8.70001e-07	0.0555482	0.0944815	0.594157	24.1879
rs142131560	11	81209642	C	T	0.0322235	0.00697515	3.79997e-06	0.014731	0.0630277	0.987128	21.3422
rs1422533	5	166786973	A	G	-0.0246897	0.00460721	8.40001e-08	0.0293937	0.0447926	0.523581	28.7181
rs143998384	2	37606538	G	A	0.0424277	0.0093332	5.49997e-06	0.162595	0.0791078	0.0435472	20.6651
rs145406151	7	101580821	T	C	-0.0384686	0.00819959	2.69998e-06	0.0791438	0.0761073	0.253316	22.0104
rs150351	15	89930588	A	G	0.0104519	0.00229239	5.1e-06	-0.00510501	0.022031	0.753288	20.788
rs1663463	12	62523578	T	G	-0.0102778	0.00213399	1.5e-06	-0.0636536	0.0206678	0.0025222	23.1961
rs17030112	4	154463023	C	G	-0.0153029	0.00341744	7.49998e-06	-8.80039e-05	0.0329121	0.923258	20.0514
rs1732330	12	116785792	A	T	-0.0100841	0.00227975	9.69996e-06	3.00005e-05	0.0219453	0.9693	19.5659
rs17762276	12	15261881	G	A	0.0341274	0.00738095	3.79997e-06	-0.0794849	0.0750828	0.271415	21.3787
rs17773128	2	211414051	T	C	0.0171438	0.00384392	8.19993e-06	-0.0175247	0.0369973	0.697586	19.8914
rs185509080	9	76443955	C	T	-0.0441862	0.00968636	5.1e-06	-0.13772	0.0977607	0.162877	20.809
rs2184061	9	22061562	A	C	0.00969201	0.00217731	8.50002e-06	0.00637961	0.0210352	0.761172	19.8147
rs2194513	2	205803372	G	A	0.0114189	0.00236045	1.29999e-06	-0.0142683	0.0228509	0.527393	23.4023
rs2414812	15	63430456	T	C	0.0109886	0.00240998	5.1e-06	-0.00428818	0.023394	0.764916	20.7902
rs35675286	4	65273190	A	G	0.0324049	0.00684251	2.19999e-06	0.0155288	0.062185	0.920526	22.428
rs3740390	10	104638480	T	C	0.0188788	0.00393675	1.6e-06	-0.034163	0.0388271	0.359871	22.9971
rs3757541	7	121962454	G	A	0.00985677	0.00220909	8.09991e-06	0.0408444	0.0213146	0.0575056	19.9087
rs4653015	1	33776431	T	C	0.0113815	0.00242646	2.69998e-06	0.00403186	0.0234672	0.825152	22.0015
rs4838594	10	49669142	C	T	0.0120217	0.00251791	1.79999e-06	-0.0416932	0.0244915	0.0802786	22.7956
rs4915350	1	199204067	C	A	0.0461873	0.00792893	5.69994e-09	-0.0651307	0.0805014	0.338881	33.9325
rs58824859	5	137976541	C	A	0.0108573	0.00228573	2e-06	0.0345367	0.0213285	0.100829	22.5628
rs59083789	9	98825524	G	A	0.0210007	0.00409618	2.90001e-07	0.0169554	0.0396521	0.630109	26.2851
rs59727727	6	31329797	C	T	0.0180056	0.00324316	2.80001e-08	0.0571173	0.0316227	0.0619127	30.8233
rs6069904	20	55409111	T	G	-0.0363553	0.00806639	6.59994e-06	0.0288887	0.0814821	0.729091	20.3131
rs61932582	12	76131004	C	T	-0.0250104	0.00509229	8.99995e-07	-0.0562593	0.0493467	0.206979	24.1221
rs62009152	15	78001011	C	T	-0.011411	0.00243799	2.90001e-06	-0.0413044	0.0237858	0.13567	21.907
rs6602678	10	13772953	G	A	-0.0101227	0.00226992	8.19993e-06	0.0241949	0.021913	0.235756	19.8871
rs6968423	7	88667859	A	G	0.0109912	0.0024786	9.20005e-06	0.0237458	0.0240897	0.347779	19.6642
rs7040968	9	2148966	A	G	-0.011566	0.00250921	4e-06	-0.000637203	0.0230951	0.926453	21.2467
rs706809	12	52294257	C	T	0.012185	0.00256771	2.1e-06	0.0282181	0.02485	0.271699	22.5195
rs71431112	14	76502896	T	C	-0.0133757	0.00301857	9.40005e-06	0.0180364	0.0289333	0.591067	19.635
rs7242726	18	77209568	C	G	0.00996195	0.00224897	9.40005e-06	0.00549488	0.0216957	0.83485	19.621
rs7258448	19	2257230	C	G	0.0126746	0.00272063	3.2e-06	-0.0420436	0.0261414	0.115174	21.7035
rs72632762	8	35050140	C	T	-0.0158813	0.00321863	8e-07	-0.0358894	0.0312426	0.233906	24.3461
rs72678678	4	97000222	T	G	0.0132561	0.00282638	2.69998e-06	-0.00282298	0.0272653	0.877047	21.9974
rs72836643	17	38378825	G	A	-0.0244147	0.00548375	8.50002e-06	0.000679769	0.0446782	0.986907	19.822
rs73151438	2	7961427	A	C	0.0221844	0.00490622	6.1e-06	-0.0249005	0.0364054	0.359949	20.4457
rs73596615	19	51166225	A	G	0.0144039	0.00311939	3.89996e-06	-0.0221924	0.0305575	0.460448	21.3217
rs73965555	18	68806073	G	T	-0.0360438	0.00810424	8.70001e-06	0.041401	0.0759721	0.482193	19.7805
rs74391364	2	77285524	A	G	-0.0335369	0.00723171	3.50002e-06	0.0124917	0.0681402	0.745355	21.5062
rs74544139	2	175687493	G	C	-0.016699	0.00374099	8.09991e-06	0.00534569	0.0354081	0.866859	19.9254
rs7505177	18	75220892	T	G	-0.0114832	0.00216493	1.09999e-07	0.0397206	0.0208393	0.104262	28.1344
rs76127258	17	77190106	G	A	0.0174102	0.00361551	1.5e-06	0.0117705	0.0346569	0.783792	23.1883
rs77036000	5	30880271	A	T	-0.0215381	0.00484491	8.79995e-06	0.0775812	0.0448379	0.11494	19.7626
rs77205736	8	10153460	T	C	0.013087	0.0023929	4.49997e-08	-0.0273589	0.023256	0.24121	29.911
rs77662016	14	91627435	C	A	0.0218379	0.00478594	5e-06	0.040806	0.0460362	0.262835	20.8203
rs77938042	6	50679830	A	C	-0.0198417	0.00434983	5.1e-06	-0.0163316	0.0421985	0.686101	20.8072
rs78090388	4	122832424	G	T	0.0428599	0.00958821	7.79992e-06	0.028257	0.0913478	0.663028	19.9815
rs79475047	6	20992197	C	T	0.0397461	0.0065854	1.6e-09	0.0840562	0.0613963	0.247304	36.4271
rs8046866	16	544664	A	G	0.0105621	0.00221063	1.79999e-06	-0.0316785	0.0211584	0.136445	22.828
rs8132813	21	46483467	C	A	0.0104688	0.00236853	9.90011e-06	0.0141691	0.0226539	0.575264	19.536
rs870614	16	85984015	A	G	0.011999	0.00266434	6.69993e-06	0.00980181	0.0254688	0.637539	20.282
rs884436	10	129280178	T	C	0.0115496	0.00214213	7.00003e-08	0.0214581	0.0206308	0.3119	29.0698
rs9353390	6	87070142	A	G	-0.0097892	0.00213112	4.39997e-06	-0.0128451	0.0206281	0.598669	21.0998
rs9409053	9	99021829	G	C	-0.0191838	0.00427344	7.19996e-06	-0.0504589	0.0413452	0.203394	20.1518
rs9550939	13	23831474	A	C	0.0102179	0.0021877	2.99999e-06	0.00927684	0.0208834	0.721405	21.8146

## Sheet: PM2.5-10
Characteristics of the genetic instrument variables for PM2.5-10 on non-alcoholic fatty liver disease in the derivation dataset in the Mendelian randomization study at level p < 1E-5
SNP	chr	pos	effect_allele.exposure	other_allele.exposure	beta.exposure	se.exposure	pval.exposure	beta.outcome	se.outcome	pval.outcome	F statistics
rs10099257	8	132367285	T	C	-0.0114712	0.00258987	9.49992e-06	-0.00523769	0.0244655	0.923958	19.6183
rs111308789	7	13421408	A	T	-0.0219385	0.00472875	3.50002e-06	0.0685368	0.0431044	0.0887851	21.5239
rs1157546	8	18777006	C	T	-0.0246035	0.00490067	5.19996e-07	0.0226222	0.0462515	0.578809	25.2048
rs11621531	14	103577789	A	G	-0.0231281	0.00448732	2.5e-07	0.0413051	0.0411735	0.354052	26.5648
rs116259145	5	3279667	A	C	0.0301641	0.00618506	1.09999e-06	0.0978524	0.0558482	0.0626412	23.7844
rs116816317	4	133858337	A	G	0.0376491	0.00796504	2.30001e-06	-0.000257033	0.0748695	0.953302	22.3426
rs117389221	9	133798921	C	T	-0.0402216	0.00850122	2.19999e-06	0.107149	0.0749391	0.13055	22.385
rs118101191	7	111672596	T	G	0.0597911	0.0110633	6.49995e-08	-0.0848337	0.106978	0.437759	29.2081
rs12462492	19	22710669	T	G	-0.0123914	0.00249623	6.90001e-07	0.0121953	0.0234973	0.605528	24.6418
rs13125748	4	178069165	A	C	0.0114526	0.0025016	4.70002e-06	-0.0109942	0.0236882	0.597502	20.9591
rs138141967	4	110987693	T	G	-0.0429378	0.00915495	2.69998e-06	0.108137	0.0822504	0.16946	21.9972
rs143921782	13	39169251	C	T	0.0503784	0.0113484	8.99995e-06	0.0166604	0.101707	0.857564	19.707
rs1706918	7	105272307	A	G	0.018349	0.00367669	5.99998e-07	0.00200798	0.0345765	0.896512	24.9064
rs1748399	1	36655652	T	C	0.00997495	0.0022052	6.1e-06	0.0170243	0.0208747	0.39149	20.4609
rs17675316	7	35316123	G	A	0.0369053	0.00788044	2.80001e-06	-0.129395	0.0753853	0.104321	21.9319
rs4145410	22	22401006	G	A	-0.0133621	0.00298339	7.49998e-06	-0.00943739	0.0279703	0.661336	20.0599
rs4716063	6	16381395	G	A	-0.0191355	0.00422184	5.80003e-06	-0.0328662	0.0388647	0.441007	20.5436
rs57048268	7	151623218	C	A	-0.0110199	0.00236534	3.2e-06	-0.00957974	0.0222915	0.61776	21.7054
rs605027	12	72900322	T	C	-0.0113937	0.00245355	3.40001e-06	-0.0108284	0.0232884	0.739379	21.5645
rs6063430	20	48404077	C	T	-0.0111674	0.00247449	6.4e-06	0.0108113	0.0218733	0.592647	20.3673
rs6078746	20	12737097	G	A	0.010355	0.00227683	5.39995e-06	0.00659818	0.0215557	0.844584	20.6842
rs62079137	17	76358269	C	T	-0.0173504	0.00374272	3.59998e-06	-0.00610963	0.033409	0.847033	21.4904
rs62414841	6	63055986	T	C	0.0292893	0.00654516	7.59994e-06	-0.0570435	0.0629746	0.359154	20.0252
rs7023300	9	16238128	A	T	-0.0102891	0.00232358	9.49992e-06	-0.006488	0.0218075	0.681375	19.6083
rs7033430	9	93901159	G	T	-0.0117287	0.00258533	5.69994e-06	0.0421395	0.0245844	0.112592	20.5811
rs71323440	3	116072052	T	C	0.0162929	0.00340779	1.7e-06	-0.0160897	0.0327131	0.629282	22.8587
rs72737245	5	32499805	G	A	-0.0115499	0.00260226	9.09997e-06	-0.0918478	0.0249291	0.000254074	19.6995
rs74029037	15	92987146	T	C	0.0256495	0.00574408	8e-06	0.119728	0.0521383	0.025332	19.9396
rs74561197	4	189419188	A	G	-0.0104975	0.00233259	6.80002e-06	0.0189689	0.0220446	0.385456	20.2533
rs76170056	1	3592598	A	C	0.0165077	0.003462	1.89998e-06	0.0100988	0.0329404	0.691509	22.7363
rs78060907	5	37945741	A	C	-0.0380539	0.00769756	7.69999e-07	0.00162867	0.0722742	0.937662	24.4395
rs79050669	12	78217999	T	G	0.0269531	0.00600028	7.10003e-06	-0.077714	0.060048	0.16525	20.1778
rs8006373	14	57123141	A	T	-0.0175837	0.00377824	3.29997e-06	-0.0750652	0.0373748	0.0392004	21.6592
rs8051340	16	11041413	G	C	0.0160734	0.00332586	1.29999e-06	-0.0194948	0.0319252	0.553989	23.3565
rs9497937	6	148423453	A	C	-0.0127713	0.00257727	7.19996e-07	-0.0151461	0.0244407	0.448567	24.5556
rs9868243	3	113300863	C	T	0.012451	0.00274417	5.69994e-06	-0.0021934	0.0261383	0.850035	20.5867
rs9956831	18	74268809	T	C	-0.0418647	0.00920923	5.49997e-06	0.0917219	0.0836997	0.296246	20.6657
rs9997134	4	3468969	C	T	-0.010473	0.002255	3.40001e-06	-0.00260238	0.0210733	0.941545	21.5699

## Sheet: PM10
Characteristics of the genetic instrument variables for PM10 on non-alcoholic fatty liver disease in the derivation dataset in the Mendelian randomization study at level p < 1E-5
SNP	chr	pos	effect_allele.exposure	other_allele.exposure	beta.exposure	se.exposure	pval.exposure	beta.outcome	se.outcome	pval.outcome	F statistics
rs1039952	11	97640999	C	G	-0.0103076	0.00217938	2.19999e-06	0.0110781	0.0206291	0.579377	22.3691
rs10846277	12	16211780	G	A	-0.0162463	0.00340904	1.89998e-06	0.0210665	0.0322408	0.684597	22.7114
rs10854454	21	23476772	C	T	-0.0148854	0.00332456	7.59994e-06	0.0039721	0.0317058	0.869712	20.0472
rs10927122	1	244244117	T	C	0.0133808	0.00302081	9.40005e-06	0.0197438	0.0275174	0.452494	19.6208
rs10961167	9	13603291	A	G	-0.0195322	0.00409857	1.89998e-06	0.0240778	0.0365471	0.503242	22.7111
rs111308789	7	13421408	A	T	-0.0214037	0.00471304	5.60003e-06	0.0685368	0.0431044	0.0887851	20.6241
rs11621531	14	103577789	A	G	-0.0217207	0.00447256	1.2e-06	0.0413051	0.0411735	0.354052	23.585
rs117122280	9	133311860	T	C	0.0388327	0.00836887	3.50002e-06	-0.0893822	0.0836061	0.303862	21.5309
rs117667551	14	66418986	A	G	-0.0434223	0.00962484	6.4e-06	0.109267	0.0869777	0.279928	20.3535
rs117671171	6	159246615	T	C	-0.0420185	0.008321	4.39997e-07	0.0447152	0.0770658	0.638449	25.4994
rs12192953	6	94818099	T	C	-0.0387119	0.00738282	1.6e-07	0.0537303	0.0662494	0.465349	27.4944
rs12462492	19	22710669	T	G	-0.0111364	0.00248823	7.59994e-06	0.0121953	0.0234973	0.605528	20.0313
rs12571175	10	127771554	G	T	0.0118316	0.00253557	3.09999e-06	0.0502272	0.0237431	0.0503396	21.7739
rs141307730	12	69091515	C	T	0.0446264	0.00995826	7.39997e-06	0.0219963	0.0918478	0.72237	20.0825
rs145045547	8	342124	G	A	-0.0200821	0.0043472	3.79997e-06	-0.0159942	0.0404675	0.602686	21.3402
rs146776068	3	47842610	A	G	0.0344912	0.00779478	9.59997e-06	-0.0557939	0.075049	0.472038	19.5798
rs149752881	2	33098355	C	T	-0.0287918	0.00611452	2.5e-06	0.109688	0.0557257	0.0388857	22.1724
rs150351	15	89930588	A	G	0.0104655	0.00232998	7.10003e-06	-0.00510501	0.022031	0.753288	20.1751
rs150993762	10	64836267	T	C	-0.028982	0.00629425	4.09996e-06	-0.0414951	0.0590839	0.555668	21.2016
rs183032395	17	52666856	T	G	-0.0457862	0.0103156	9.09997e-06	-0.0878361	0.09707	0.332861	19.7006
rs2030237	2	58196110	G	A	-0.00983769	0.00220183	7.90005e-06	-0.00963628	0.0209279	0.700155	19.9627
rs2156672	11	79325064	C	T	0.0140933	0.00310093	5.49997e-06	0.0185666	0.0295994	0.566685	20.6558
rs218514	18	1469513	T	C	-0.0120578	0.00262368	4.30002e-06	-0.0014841	0.0244534	0.971191	21.121
rs2311422	2	69064431	T	C	0.0158892	0.00356469	8.30004e-06	-0.0472017	0.0346808	0.207716	19.8683
rs2745979	1	208018219	C	G	-0.0110589	0.00238584	3.59998e-06	-0.00179361	0.02263	0.96165	21.4853
rs277838	13	109711672	G	A	-0.00965113	0.00217411	8.99995e-06	-0.0104019	0.0206506	0.605968	19.7058
rs2812230	13	51264767	C	T	0.0460816	0.0100244	4.30002e-06	-0.0259046	0.097373	0.79998	21.1319
rs34776465	15	57656713	A	G	0.027384	0.00578149	2.19999e-06	-0.0418788	0.0563726	0.386573	22.4344
rs35665267	5	51178554	T	C	-0.035513	0.00766936	3.59998e-06	0.0549805	0.0707449	0.370142	21.4416
rs35695929	19	441111	C	T	0.0378049	0.00854778	9.69996e-06	-0.000289042	0.08277	0.961012	19.5609
rs4587353	8	2508755	T	C	0.0158704	0.00348808	5.39995e-06	-0.0314865	0.0335966	0.313963	20.7016
rs4727624	7	105257560	A	G	0.0131715	0.00288479	5e-06	0.00050987	0.027221	0.961432	20.8469
rs4815138	20	286487	A	G	0.0117626	0.0022683	2.19999e-07	-0.00821566	0.0213094	0.684244	26.8909
rs4959880	6	442206	A	G	0.0125981	0.00283952	9.09997e-06	0.0331446	0.0271794	0.240996	19.6843
rs57048268	7	151623218	C	A	-0.0124891	0.00235748	1.2e-07	-0.00957974	0.0222915	0.61776	28.0651
rs61447184	5	101445992	T	C	-0.0258626	0.00554552	3.09999e-06	-0.00220543	0.0525513	0.997598	21.75
rs61780359	1	51766490	A	G	-0.0193075	0.00424571	5.39995e-06	0.0116222	0.0402151	0.758917	20.68
rs61884798	11	43527219	T	C	-0.0121677	0.00272114	7.79992e-06	0.0452123	0.0254905	0.0723036	19.9947
rs62119705	19	2279746	T	C	0.0105209	0.00228303	4.09996e-06	0.0293258	0.0217938	0.21754	21.2365
rs72657284	8	68587575	A	G	-0.0399228	0.00883923	6.29999e-06	0.0377196	0.0820383	0.534908	20.3992
rs72819562	5	164643843	T	C	-0.0127818	0.00276984	3.89996e-06	0.000459894	0.0261236	0.925667	21.2949
rs72934587	18	53551147	G	A	-0.0234468	0.00515047	5.30005e-06	0.00600195	0.0484008	0.94126	20.724
rs73201440	8	11512667	G	A	0.0417032	0.00876048	1.89998e-06	-0.0578177	0.0804126	0.55451	22.6612
rs73212674	12	116200718	T	C	0.0181852	0.00403097	6.4e-06	-0.0511986	0.0385806	0.214473	20.3525
rs74756519	1	115028382	C	T	-0.0494714	0.0105999	3.09999e-06	0.0884046	0.0952906	0.370454	21.7824
rs7505177	18	75220892	T	G	-0.0107374	0.00220019	1.09999e-06	0.0397206	0.0208393	0.104262	23.8165
rs76127531	2	36195418	G	A	-0.0211702	0.00471149	7.00003e-06	-0.0425422	0.0456838	0.330896	20.1899
rs79037220	13	50507971	A	G	-0.032334	0.00646144	5.60003e-07	0.0449256	0.0602348	0.542654	25.0415
rs79723051	1	165189003	A	G	-0.0311648	0.00689149	6.1e-06	-0.0720568	0.0656835	0.239738	20.4504
rs80230137	14	48380718	G	A	0.0420186	0.00823522	3.40001e-07	-0.0905047	0.0861734	0.334077	26.0335
rs8034347	15	68925781	A	G	-0.0164801	0.00350209	2.5e-06	-0.0143342	0.0330899	0.712234	22.1445
rs837128	15	37244216	C	T	-0.0120166	0.00266866	6.69993e-06	-0.00973927	0.0251856	0.732749	20.2757
rs9354437	6	67227883	G	A	-0.0102497	0.00231211	9.29994e-06	0.00243703	0.0220045	0.932757	19.6519

## Sheet: Nitrogen dioxide
Characteristics of the genetic instrument variables for nitrogen dioxide on non-alcoholic fatty liver disease in the derivation dataset in the Mendelian randomization study at level p < 1E-5
SNP	chr	pos	effect_allele.exposure	other_allele.exposure	beta.exposure	se.exposure	pval.exposure	beta.outcome	se.outcome	pval.outcome	F statistics
rs10083354	14	87487691	A	G	0.010597	0.0023751	8.09991e-06	0.0136958	0.0226114	0.52537	19.9068
rs10094026	8	8646438	A	G	0.0150639	0.00304795	7.69999e-07	0.0462154	0.0303087	0.158054	24.4264
rs10116277	9	22081397	T	G	0.00972771	0.00204522	2e-06	5.99982e-05	0.0206418	0.952882	22.6225
rs10172295	2	58201202	A	G	-0.0102936	0.00208179	7.59994e-07	-0.00486381	0.0209247	0.872253	24.449
rs10512199	9	93197125	C	G	0.0223965	0.00477542	2.69998e-06	-0.0453897	0.0493321	0.344951	21.9957
rs10750459	11	130903582	T	C	-0.00985303	0.00210846	2.99999e-06	-0.029018	0.0209566	0.172042	21.8378
rs10838511	11	45780039	T	C	0.0180857	0.00395544	4.79999e-06	0.0357339	0.0389647	0.331003	20.9065
rs10852602	16	49762462	A	C	0.0149971	0.00273431	4.09996e-08	0.00430074	0.0275492	0.817283	30.0829
rs10983735	9	120416066	A	G	0.0156804	0.00283547	3.2e-08	0.0191455	0.0283863	0.505266	30.5819
rs11049241	12	28119596	A	C	0.0124993	0.00263194	2e-06	0.00872185	0.0264234	0.839468	22.5538
rs111288222	1	227090717	T	C	-0.0386416	0.00834142	3.59998e-06	0.0588348	0.0798358	0.373551	21.46
rs11204762	1	150999737	G	A	-0.0110104	0.00238685	4e-06	-0.01914	0.0240532	0.47305	21.2792
rs114433024	5	139208055	A	G	0.0334699	0.0074954	8e-06	0.147696	0.0709572	0.060555	19.9397
rs114708313	6	31329004	T	A	0.0227095	0.00426159	9.90011e-08	0.123288	0.0405226	0.00293299	28.397
rs11681014	2	135135102	G	A	-0.00985539	0.00213843	4.09996e-06	0.0359268	0.021743	0.10592	21.2401
rs117145198	16	3944638	T	C	-0.0125696	0.00283777	9.49992e-06	-0.00277284	0.0282815	0.919459	19.6195
rs117392835	11	27686250	G	A	0.0326984	0.00733252	8.19993e-06	0.0718089	0.0681603	0.394259	19.886
rs11844580	14	34241004	A	G	-0.0132439	0.00284617	3.29997e-06	-0.0431278	0.0291224	0.128237	21.6526
rs12089815	1	91189933	A	G	-0.00958246	0.00206171	3.40001e-06	-0.0274031	0.020702	0.157736	21.6022
rs1217106	8	64567670	G	A	0.0140134	0.00249759	2e-08	0.0102077	0.0249733	0.698779	31.4807
rs12451892	17	2247982	C	T	0.00970902	0.00212158	4.70002e-06	-0.00734592	0.0212849	0.666064	20.9427
rs12576368	11	57942072	C	T	-0.0100138	0.00226437	9.80009e-06	-0.0554334	0.0230016	0.0206871	19.557
rs1318845	4	153001662	C	T	-0.0130453	0.00257421	4e-07	0.0504364	0.0253287	0.0375448	25.6815
rs13254457	8	40707884	C	A	-0.0114495	0.00239699	1.79999e-06	0.0518047	0.0237528	0.0333918	22.8161
rs1336932	13	57553346	A	G	0.0103342	0.00227883	5.80003e-06	0.0229643	0.023013	0.338313	20.5651
rs13421943	2	6777264	T	C	0.0154658	0.00307844	5.1e-07	-0.0298511	0.0311724	0.309179	25.2397
rs13429081	2	185963522	T	A	0.0128893	0.00263883	1e-06	0.029151	0.0262743	0.329278	23.8581
rs1372504	5	103749428	A	G	0.0103554	0.00211393	9.59997e-07	0.0143762	0.021286	0.495867	23.9968
rs137867530	15	25488099	T	C	-0.0384693	0.00794035	1.29999e-06	-0.0910764	0.0818781	0.309473	23.472
rs145183657	20	54919373	G	C	0.0449497	0.00947363	2.1e-06	0.197891	0.0770749	0.00577364	22.5123
rs145468213	15	23679968	A	G	-0.0433805	0.00968684	7.49998e-06	-0.0480375	0.0865036	0.445683	20.0551
rs145957749	16	80690635	A	C	-0.0316234	0.00703013	6.90001e-06	-0.0730633	0.0701061	0.2768	20.2344
rs1461742	4	91255176	A	G	0.00931348	0.00205849	6.1e-06	0.0281306	0.0207678	0.21275	20.4704
rs17183854	18	3100049	G	T	-0.0429541	0.00901484	1.89998e-06	0.0785431	0.0873328	0.321973	22.7035
rs17183866	14	76507459	G	A	-0.0133766	0.00298925	7.59994e-06	0.0290441	0.0297439	0.361891	20.0247
rs17513184	5	53585870	T	C	-0.018716	0.0038227	9.80009e-07	0.0139424	0.0369437	0.600211	23.971
rs17688839	7	92263350	T	A	0.01259	0.00260732	1.40001e-06	0.00050987	0.0261417	0.956707	23.3165
rs182075682	15	81108038	T	A	0.0432875	0.0092875	3.09999e-06	0.154376	0.0759699	0.0188092	21.7234
rs1897405	2	82085450	T	A	0.0107111	0.00218507	9.49992e-07	-0.0357598	0.0221685	0.122622	24.0291
rs2058582	4	13892169	G	A	0.0102993	0.00223922	4.20001e-06	0.0310141	0.022596	0.173241	21.1554
rs2278801	18	77209015	G	A	0.00965141	0.00215941	7.79992e-06	0.00344406	0.0217003	0.912437	19.9761
rs243500	7	148439365	C	G	0.00966257	0.00209446	4e-06	-0.01811	0.0208466	0.337911	21.2834
rs2670132	3	102197454	T	C	-0.0139441	0.00313045	8.40001e-06	-0.0198273	0.0311949	0.566785	19.8412
rs2687960	4	39443584	A	G	-0.0311521	0.00701476	8.99995e-06	-0.0624564	0.0703986	0.340062	19.7219
rs27152	5	153734582	T	C	-0.0100751	0.00219189	4.30002e-06	0.0225146	0.0219252	0.242537	21.1281
rs2838761	21	46481557	G	A	0.0139755	0.00304505	4.39997e-06	0.037132	0.0303085	0.279084	21.0642
rs28655947	2	69152401	C	T	0.0201622	0.0041442	1.09999e-06	0.0655911	0.041009	0.0889017	23.6698
rs28709846	2	21685654	G	A	-0.0153369	0.00330989	3.59998e-06	-0.00355331	0.0328831	0.934159	21.4708
rs329177	5	125130444	A	G	0.0107315	0.00216058	6.80002e-07	-0.020517	0.0211062	0.232899	24.6706
rs34623735	10	129281256	T	C	0.0107705	0.00218214	8e-07	0.0106926	0.0218613	0.60134	24.3616
rs35621351	7	55380566	C	T	-0.0350603	0.00742849	2.39999e-06	-0.0723632	0.0763228	0.38545	22.2756
rs356543	2	164851354	G	A	0.0108015	0.00235154	4.39997e-06	-0.00207916	0.0236941	0.857041	21.0991
rs35675286	4	65273190	A	G	0.0291022	0.00651424	7.90005e-06	0.0155288	0.062185	0.920526	19.9583
rs35745455	7	5824100	G	A	-0.00908376	0.00204479	8.9e-06	0.00192814	0.0206285	0.788352	19.7349
rs3740390	10	104638480	T	C	0.0209748	0.00377883	2.80001e-08	-0.034163	0.0388271	0.359871	30.8092
rs3916875	19	45856820	A	G	-0.0359277	0.00783716	4.60002e-06	-0.067305	0.0778673	0.40426	21.0156
rs4512985	13	75635838	C	G	0.0105435	0.00210764	5.69994e-07	0.0332073	0.0209978	0.100272	25.0252
rs4771073	13	27693827	G	A	0.0160831	0.00318004	4.20001e-07	-0.0335361	0.0316511	0.243517	25.5785
rs4772055	13	98892976	A	G	-0.0126877	0.00284961	8.50002e-06	-0.017487	0.0283435	0.542994	19.8242
rs4838594	10	49669142	C	T	0.0113964	0.00241321	2.30001e-06	-0.0416932	0.0244915	0.0802786	22.3021
rs533745	1	34419822	A	G	0.00969921	0.00210349	4e-06	-0.00487687	0.0211872	0.858067	21.2614
rs55643000	12	5773969	G	T	-0.0204187	0.00428631	1.89998e-06	-0.00713943	0.042379	0.982915	22.6928
rs55974805	7	133771130	T	C	-0.0113675	0.00237872	1.79999e-06	0.00019998	0.023935	0.999245	22.8372
rs56118546	5	164465890	G	T	-0.0175571	0.00285444	7.69999e-10	-0.0184909	0.0284085	0.577537	37.8324
rs57291759	2	213625968	C	A	-0.0300886	0.00639175	2.5e-06	0.01838	0.0629224	0.811813	22.1597
rs58709801	12	76270006	G	A	-0.0150792	0.00339399	8.9e-06	-0.0363777	0.0346506	0.25722	19.7395
rs58824859	5	137976541	C	A	0.0118268	0.00219366	7.00003e-08	0.0345367	0.0213285	0.100829	29.0667
rs6043520	20	15738249	C	T	0.00962425	0.00213901	6.80002e-06	0.0156174	0.0211059	0.574261	20.2446
rs61746285	12	55968949	A	G	0.0300981	0.00618418	1.09999e-06	0.150968	0.059098	0.0142436	23.6872
rs61775107	1	14054970	T	C	-0.0113821	0.00241176	2.39999e-06	0.00801777	0.0241923	0.714018	22.2729
rs62062033	17	6254811	T	C	0.0129274	0.00275083	2.59998e-06	-0.00145205	0.0273268	0.980576	22.0849
rs62119705	19	2279746	T	C	0.00992086	0.00215778	4.30002e-06	0.0293258	0.0217938	0.21754	21.139
rs62459096	7	44268127	T	G	-0.0207931	0.00438464	2.1e-06	-0.0310811	0.0405854	0.39282	22.489
rs6589520	11	115851152	G	T	0.0225775	0.0049727	5.60003e-06	-0.0754727	0.052303	0.161704	20.6142
rs6667345	1	8197477	T	C	0.0120277	0.00243539	7.90005e-07	0.0263498	0.0230985	0.324855	24.3909
rs6749467	2	343517	A	G	-0.0106399	0.00207826	3.09999e-07	-0.026804	0.0206934	0.240712	26.2105
rs6773456	3	191765223	G	A	0.00946298	0.00207439	5.1e-06	-0.0254747	0.0209604	0.205632	20.8101
rs6954825	7	101207035	C	T	0.0134611	0.00279712	1.5e-06	-0.0320894	0.028587	0.253702	23.16
rs7089175	10	2958311	T	C	-0.00946298	0.00206188	4.39997e-06	-0.0212737	0.0206371	0.286934	21.0634
rs71351659	20	45743615	G	A	-0.0247331	0.00558611	9.49992e-06	0.00860289	0.0535363	0.850934	19.6037
rs714020	22	40493860	T	C	0.0123158	0.00243998	4.49997e-07	-0.055128	0.0249319	0.0357495	25.4773
rs724643	7	88669096	G	A	0.011581	0.00243102	1.89998e-06	0.0451072	0.0247503	0.0817015	22.6942
rs72633596	8	35225501	C	G	-0.0121203	0.00244662	7.29995e-07	-0.0427228	0.0249001	0.0983037	24.5411
rs72655898	13	112082676	G	A	-0.0107992	0.00228306	2.19999e-06	0.0286458	0.0226579	0.14445	22.3743
rs72795429	16	84606181	T	C	-0.0287129	0.00600813	1.79999e-06	0.0230132	0.0589531	0.691358	22.8389
rs73085844	7	30740079	G	T	-0.0331207	0.00648004	3.2e-07	0.0460722	0.064267	0.455877	26.1242
rs74251463	17	32091001	C	G	0.020064	0.00441137	5.39995e-06	0.00143896	0.0446037	0.898925	20.6866
rs74957515	6	111893800	G	C	0.013997	0.00311227	6.90001e-06	-0.00252118	0.0306542	0.807034	20.2263
rs7514956	1	74019696	C	A	-0.0132066	0.0026301	5.1e-07	-0.00512712	0.0264533	0.849747	25.2138
rs75359967	6	50491551	G	C	-0.0176484	0.00376388	2.69998e-06	-0.0413648	0.0380298	0.288896	21.9856
rs75591339	15	83627623	C	T	-0.0231955	0.00488467	2e-06	0.0327285	0.0480496	0.266856	22.5495
rs7615084	3	174719405	A	G	0.0135202	0.00276029	9.69996e-07	0.0492377	0.0275534	0.092871	23.9915
rs76572490	4	105641593	G	A	0.0159377	0.00337812	2.39999e-06	0.000779696	0.0335924	0.942734	22.2588
rs76892360	5	7381172	C	T	-0.0115719	0.00255586	5.99998e-06	-0.00646988	0.0256707	0.777243	20.4991
rs77205736	8	10153460	T	C	0.0148569	0.00229517	9.60064e-11	-0.0273589	0.023256	0.24121	41.9012
rs77284918	2	123469715	A	G	0.0268815	0.00594948	6.19998e-06	0.0107619	0.058803	0.672791	20.415
rs77586137	8	143137894	A	G	-0.0154582	0.00334203	3.69999e-06	-0.0105393	0.0324859	0.702102	21.3943
rs7760633	6	87297558	T	C	-0.00985243	0.00214122	4.20001e-06	0.00278612	0.0213192	0.825065	21.1721
rs7776279	6	163999770	A	G	0.0118368	0.00227307	1.89998e-07	0.0441796	0.0230213	0.0498322	27.1171
rs7787278	7	22216064	A	G	-0.00918235	0.00205016	7.49998e-06	0.0063498	0.0206464	0.598177	20.0601
rs78379279	1	196215570	C	T	-0.031873	0.00710878	7.29995e-06	-0.0698368	0.0713462	0.310117	20.1028
rs78387400	16	54206097	A	G	0.0271431	0.00585868	3.59998e-06	0.0847363	0.0573637	0.160626	21.4644
rs78539764	12	12490981	C	T	-0.030081	0.00627021	1.6e-06	0.0216245	0.0617539	0.658705	23.0155
rs7910200	10	15981388	T	C	-0.0102176	0.00207188	8.19993e-07	0.0288887	0.0208238	0.139239	24.3203
rs79232384	12	125729002	T	C	-0.0221341	0.00500931	9.90011e-06	-0.00475227	0.0501842	0.965746	19.524
rs79475047	6	20992197	C	T	0.0369793	0.00626977	3.69999e-09	0.0840562	0.0613963	0.247304	34.7868
rs80123875	3	148486829	T	G	-0.0176865	0.0036924	1.7e-06	0.00410158	0.0354412	0.859902	22.9439
rs80339785	8	27818236	T	C	-0.023713	0.0051799	4.70002e-06	-0.0440292	0.0528615	0.38551	20.9571
rs9368527	6	27679445	A	C	-0.0111924	0.00212721	1.40001e-07	-0.0244525	0.0214023	0.28911	27.6838

## Sheet: Nitrogen oxides
Characteristics of the genetic instrument variables for nitrogen oxides on non-alcoholic fatty liver disease in the derivation dataset in the Mendelian randomization study at level p < 1E-5
SNP	chr	pos	effect_allele.exposure	other_allele.exposure	beta.exposure	se.exposure	pval.exposure	beta.outcome	se.outcome	pval.outcome	F statistics
rs10094026	8	8646438	A	G	0.0150356	0.00307374	1e-06	0.0462154	0.0303087	0.158054	23.928
rs10172295	2	58201202	A	G	-0.011327	0.0020994	6.80002e-08	-0.00486381	0.0209247	0.872253	29.1098
rs10512199	9	93197125	C	G	0.0226395	0.00481583	2.59998e-06	-0.0453897	0.0493321	0.344951	22.1
rs10515343	5	102623445	G	A	-0.0441969	0.00950358	3.29997e-06	0.0902063	0.0890979	0.261805	21.6276
rs10734177	11	88673032	C	A	-0.0100208	0.0021091	2e-06	-0.0531255	0.0208767	0.0233642	22.5741
rs10848647	12	375620	G	A	-0.00999055	0.00209863	1.89998e-06	-0.0536487	0.0208931	0.0151091	22.6625
rs10852602	16	49762462	A	C	0.0133403	0.00275738	1.29999e-06	0.00430074	0.0275492	0.817283	23.4066
rs10983735	9	120416066	A	G	0.0138036	0.00285946	1.40001e-06	0.0191455	0.0283863	0.505266	23.3033
rs11016225	10	130192301	G	A	-0.00973085	0.00210617	3.79997e-06	0.0362258	0.0209486	0.0828667	21.3459
rs11049241	12	28119596	A	C	0.0137015	0.00265415	2.39999e-07	0.00872185	0.0264234	0.839468	26.6493
rs111821301	12	81477231	A	G	-0.0093717	0.00209409	7.59994e-06	-0.0363279	0.0208254	0.0943192	20.0284
rs112304856	20	42966957	G	C	0.0399619	0.00903905	9.80009e-06	0.0542798	0.0850231	0.611018	19.5455
rs114836545	5	28294213	G	T	-0.0456586	0.0100076	5.1e-06	0.0259796	0.0975686	0.732519	20.8154
rs115860766	6	31328860	T	C	0.0200101	0.00383693	1.79999e-07	0.124286	0.0374448	0.00175017	27.1976
rs116453595	1	17899966	A	G	-0.0385824	0.0086273	7.69999e-06	-0.087501	0.0858942	0.327321	19.9999
rs116940741	7	41325135	C	T	-0.0127998	0.00286911	8.09991e-06	-0.0147218	0.0273451	0.656706	19.9027
rs116973689	17	60292881	T	C	0.0122634	0.00274955	8.19993e-06	0.0289955	0.0272518	0.226484	19.8929
rs117878224	22	18475815	G	A	-0.0455208	0.00966778	2.5e-06	0.0562953	0.0944331	0.507854	22.17
rs11855821	15	78008843	A	G	-0.0118372	0.00233568	4e-07	-0.0347861	0.0230368	0.195537	25.6845
rs12089815	1	91189933	A	G	-0.0106176	0.00207925	3.29997e-07	-0.0274031	0.020702	0.157736	26.0759
rs1217106	8	64567670	G	A	0.0145574	0.00251872	7.49998e-09	0.0102077	0.0249733	0.698779	33.4047
rs12229183	12	119574662	A	C	0.0122616	0.00252522	1.2e-06	0.0428775	0.0250789	0.0779848	23.5774
rs12522747	5	30879539	A	G	-0.0141556	0.00317117	8.09991e-06	0.0774887	0.0308707	0.0186192	19.9259
rs12637852	3	28626080	T	C	-0.010474	0.00227847	4.30002e-06	0.0148985	0.0227002	0.466721	21.1319
rs13035764	2	24717928	C	G	0.00951637	0.00210102	5.89997e-06	0.0189003	0.0207354	0.35054	20.5155
rs1318845	4	153001662	C	T	-0.0141726	0.00259612	4.79999e-08	0.0504364	0.0253287	0.0375448	29.8023
rs13254457	8	40707884	C	A	-0.0108231	0.00241728	7.59994e-06	0.0518047	0.0237528	0.0333918	20.047
rs13413741	2	162631337	G	A	-0.011882	0.00267449	8.9e-06	-0.0027588	0.0267668	0.916742	19.7377
rs13421943	2	6777264	T	C	0.0142508	0.00310448	4.39997e-06	-0.0298511	0.0311724	0.309179	21.0718
rs13429081	2	185963522	T	A	0.0134535	0.00266115	4.30002e-07	0.029151	0.0262743	0.329278	25.5583
rs138491532	10	31782047	T	C	0.0423305	0.00930582	5.39995e-06	0.0169456	0.0894943	0.825957	20.6918
rs139916	22	40721062	A	G	0.0114078	0.00240552	2.1e-06	-0.0563672	0.0242784	0.0274359	22.4898
rs141928746	5	124223948	G	A	-0.0359953	0.00794971	5.99998e-06	-0.140173	0.080729	0.0621198	20.5017
rs144720952	3	157934865	G	A	0.0498804	0.00975627	3.2e-07	0.113641	0.0831621	0.124472	26.1392
rs145183657	20	54919373	G	C	0.0430263	0.00955328	6.69993e-06	0.197891	0.0770749	0.00577364	20.2844
rs1491722	3	68286023	G	A	-0.0101317	0.00219621	4e-06	0.00961364	0.0218941	0.664295	21.2822
rs151323121	15	45569270	A	G	-0.0400813	0.00883416	5.69994e-06	0.0469504	0.0823823	0.553448	20.5851
rs1629592	16	14124153	C	T	0.0093209	0.00209661	8.79995e-06	-0.0199527	0.0209182	0.246599	19.7643
rs17183854	18	3100049	G	T	-0.0479436	0.0090906	1.29999e-07	0.0785431	0.0873328	0.321973	27.8148
rs17183866	14	76507459	G	A	-0.0141996	0.00301444	2.5e-06	0.0290441	0.0297439	0.361891	22.1891
rs1732330	12	116785792	A	T	-0.00987714	0.00220584	7.49998e-06	3.00005e-05	0.0219453	0.9693	20.05
rs17513184	5	53585870	T	C	-0.0199381	0.00385523	2.30001e-07	0.0139424	0.0369437	0.600211	26.7465
rs17657881	7	17757841	C	T	-0.036717	0.00779334	2.5e-06	0.0263498	0.0759506	0.60616	22.1966
rs1876281	8	25278509	T	C	-0.0098003	0.0021248	4e-06	-0.0207569	0.0210237	0.431556	21.2737
rs1880865	4	122901933	A	G	-0.0121328	0.00268737	6.29999e-06	-0.00750006	0.0268112	0.907303	20.383
rs1897405	2	82085450	T	A	0.0103989	0.00220355	2.39999e-06	-0.0357598	0.0221685	0.122622	22.2704
rs1906469	10	63006098	G	T	0.0136411	0.00303689	7.10003e-06	0.0400281	0.0302003	0.202065	20.1763
rs192808179	15	88907931	A	G	-0.0489147	0.0108082	5.99998e-06	0.0320508	0.100589	0.790076	20.482
rs1934641	10	16220828	T	C	-0.0149924	0.00333489	6.90001e-06	-0.0662637	0.0323017	0.0464933	20.2106
rs1960195	13	27713769	G	A	0.0180017	0.00371351	1.2e-06	-0.0744089	0.0359721	0.0323855	23.4995
rs1978728	19	1208289	T	C	-0.00956241	0.00215074	8.70001e-06	0.0206748	0.0213996	0.304289	19.7678
rs2058582	4	13892169	G	A	0.0105412	0.00225817	2.99999e-06	0.0310141	0.022596	0.173241	21.7905
rs2242523	19	36231646	T	C	-0.0092558	0.00208112	8.70001e-06	-0.0521252	0.0207546	0.019898	19.7803
rs27152	5	153734582	T	C	-0.0118668	0.00221054	8e-08	0.0225146	0.0219252	0.242537	28.8184
rs272086	13	91444152	A	G	0.0107522	0.00232792	3.89996e-06	0.0421204	0.0234322	0.0793926	21.3333
rs2838761	21	46481557	G	A	0.0148075	0.00307066	1.40001e-06	0.037132	0.0303085	0.279084	23.2541
rs28421715	2	69152418	T	A	0.0195382	0.00417891	2.90001e-06	0.0666207	0.0409905	0.0841415	21.8596
rs2904196	3	117346618	C	T	0.0108179	0.00244712	9.80009e-06	0.0116321	0.0240734	0.647077	19.5423
rs2922385	8	136924815	C	A	-0.00998209	0.00223197	7.69999e-06	-0.00466788	0.0222842	0.88375	20.0017
rs329177	5	125130444	A	G	0.0108766	0.00217897	5.99998e-07	-0.020517	0.0211062	0.232899	24.9163
rs34722237	17	65143651	T	C	-0.0130285	0.00293708	9.20005e-06	0.0168276	0.0286639	0.535621	19.6769
rs34969378	7	9277955	A	G	-0.011321	0.00222498	3.59998e-07	-0.0333293	0.0223289	0.178244	25.8891
rs35233950	2	129850521	T	C	-0.0113409	0.00242635	2.99999e-06	-0.0062032	0.0241704	0.713623	21.8468
rs356543	2	164851354	G	A	0.0105854	0.00237144	8.09991e-06	-0.00207916	0.0236941	0.857041	19.9246
rs3740390	10	104638480	T	C	0.0201657	0.00381085	1.2e-07	-0.034163	0.0388271	0.359871	28.0016
rs4512985	13	75635838	C	G	0.00966513	0.00212544	5.39995e-06	0.0332073	0.0209978	0.100272	20.6784
rs4686547	3	190093823	G	T	0.0106333	0.00220493	1.40001e-06	0.0250438	0.0220855	0.29077	23.2566
rs4721275	7	13861710	T	C	-0.0263835	0.00538109	9.40005e-07	0.0233356	0.0547259	0.645185	24.0394
rs4815138	20	286487	A	G	0.0095482	0.00216092	9.90011e-06	-0.00821566	0.0213094	0.684244	19.5239
rs4838594	10	49669142	C	T	0.0114893	0.00243366	2.30001e-06	-0.0416932	0.0244915	0.0802786	22.2878
rs4933236	10	94498436	C	T	0.00960451	0.00211355	5.49997e-06	0.0380084	0.0210723	0.0664645	20.6503
rs55974805	7	133771130	T	C	-0.0112793	0.00239879	2.59998e-06	0.00019998	0.023935	0.999245	22.1095
rs56031800	8	35273194	C	G	-0.0109985	0.00247175	8.60003e-06	-0.0390683	0.0249186	0.13103	19.7997
rs58824859	5	137976541	C	A	0.0108149	0.00221233	1e-06	0.0345367	0.0213285	0.100829	23.8971
rs61746285	12	55968949	A	G	0.0280806	0.00623636	6.69993e-06	0.150968	0.059098	0.0142436	20.2745
rs61922365	11	93064473	G	A	0.0401869	0.00902108	8.40001e-06	-0.11971	0.0937139	0.223417	19.845
rs61979822	14	87486776	T	C	0.010365	0.00234061	9.49992e-06	0.0122151	0.0224851	0.591122	19.6101
rs62119705	19	2279746	T	C	0.0101454	0.00217592	3.09999e-06	0.0293258	0.0217938	0.21754	21.7396
rs62180536	2	200915808	T	C	-0.0277279	0.00620214	7.79992e-06	-0.0507745	0.062609	0.519646	19.9871
rs62459096	7	44268127	T	G	-0.0213039	0.00442163	1.40001e-06	-0.0310811	0.0405854	0.39282	23.2142
rs62484669	7	104872861	A	G	0.0160514	0.0034763	3.89996e-06	0.0702441	0.0337707	0.0440961	21.3202
rs6667345	1	8197477	T	C	0.0127208	0.00245612	2.19999e-07	0.0263498	0.0230985	0.324855	26.8244
rs6749467	2	343517	A	G	-0.0116612	0.00209584	2.59998e-08	-0.026804	0.0206934	0.240712	30.9578
rs6888766	5	2981865	A	G	0.0116293	0.00254732	5e-06	-0.00444687	0.0208744	0.659254	20.842
rs6960011	7	90302199	G	A	-0.010116	0.00218438	3.59998e-06	-0.0340905	0.021838	0.1651	21.4467
rs7169086	15	67934454	T	C	-0.0111219	0.00242923	4.70002e-06	0.0401242	0.0240955	0.0647814	20.9614
rs718059	14	34234984	A	G	-0.0126273	0.00282787	8e-06	-0.0191196	0.027888	0.493207	19.9389
rs72654155	1	35015129	T	C	0.0132622	0.00285461	3.40001e-06	-0.00354929	0.028697	0.896291	21.5843
rs72655898	13	112082676	G	A	-0.0114916	0.00230233	5.99998e-07	0.0286458	0.0226579	0.14445	24.913
rs72795429	16	84606181	T	C	-0.0275137	0.00605881	5.60003e-06	0.0230132	0.0589531	0.691358	20.6216
rs72808024	5	164479164	C	A	-0.0170289	0.00290612	4.60002e-09	-0.00288616	0.0288231	0.985402	34.3357
rs72823561	16	82440506	T	C	-0.0130889	0.00288892	5.89997e-06	-0.0175196	0.02864	0.661439	20.5275
rs7302816	12	89950320	C	A	0.0118725	0.00260149	5e-06	0.0233258	0.0257514	0.373895	20.8276
rs73085844	7	30740079	G	T	-0.033113	0.00653471	4e-07	0.0460722	0.064267	0.455877	25.677
rs74251463	17	32091001	C	G	0.020564	0.00444855	3.79997e-06	0.00143896	0.0446037	0.898925	21.3687
rs74957515	6	111893800	G	C	0.0157546	0.00313862	5.19996e-07	-0.00252118	0.0306542	0.807034	25.1963
rs7514956	1	74019696	C	A	-0.0146107	0.00265248	3.59998e-08	-0.00512712	0.0264533	0.849747	30.3416
rs7519873	1	246964764	G	A	-0.0112386	0.00238564	2.5e-06	0.025541	0.0238339	0.255774	22.1929
rs77039956	8	106115634	G	T	0.0274031	0.00588163	3.2e-06	0.000759711	0.060526	0.883425	21.7072
rs77160823	8	127497273	C	T	-0.0174092	0.00374266	3.29997e-06	0.0131729	0.0342946	0.560738	21.637
rs77205736	8	10153460	T	C	0.0132649	0.00231459	1e-08	-0.0273589	0.023256	0.24121	32.8443
rs77255816	6	20833602	T	C	0.0299054	0.00547093	4.60002e-08	0.0674811	0.0533183	0.26179	29.8797
rs77498969	15	93559353	A	G	0.0230156	0.00504355	5e-06	0.054971	0.0491537	0.297847	20.8244
rs7753643	6	67269176	C	G	-0.0219313	0.00483749	5.80003e-06	0.00481837	0.0480258	0.801918	20.5536
rs7776279	6	163999770	A	G	0.0116503	0.00229231	3.69999e-07	0.0441796	0.0230213	0.0498322	25.8302
rs77853326	19	32893174	A	G	-0.0245956	0.00554815	9.29994e-06	0.0348168	0.0541553	0.533418	19.6525
rs7787278	7	22216064	A	G	-0.00922237	0.00206746	8.19993e-06	0.0063498	0.0206464	0.598177	19.8981
rs78379279	1	196215570	C	T	-0.0344152	0.00716928	1.6e-06	-0.0698368	0.0713462	0.310117	23.0436
rs78539764	12	12490981	C	T	-0.0301665	0.00632312	1.79999e-06	0.0216245	0.0617539	0.658705	22.7608
rs78648104	6	50683009	C	T	-0.0166905	0.00368743	5.99998e-06	-0.0401889	0.0374249	0.295088	20.4876
rs78969252	16	10300330	G	A	-0.0376404	0.00812597	3.59998e-06	0.189115	0.0730934	0.00942193	21.4565
rs7910200	10	15981388	T	C	-0.0104209	0.00208943	6.1e-07	0.0288887	0.0208238	0.139239	24.8745
rs79330479	1	102407350	T	G	0.0475261	0.0104235	5.1e-06	-0.048683	0.101534	0.639863	20.7892
rs79858230	10	28737099	T	C	-0.0190582	0.00417646	5e-06	-0.0414993	0.0415711	0.433118	20.8232
rs8006531	14	106285689	G	A	0.0120433	0.0026879	7.39997e-06	0.00179838	0.0228278	0.897624	20.0754
rs80347400	17	46012502	G	A	0.0134097	0.00291145	4.09996e-06	-0.000519135	0.0287747	0.96732	21.2138
rs8614	17	27588806	A	C	0.0139093	0.00267704	2e-07	-0.0226445	0.0269215	0.381805	26.9961
rs9495443	6	139664473	C	A	-0.0109825	0.00221464	7.10003e-07	-0.00826103	0.0218898	0.878518	24.5921
