# Supplementary material for: Investigation of the Association between Air Pollution and Non-Alcoholic Fatty Liver Disease in the European Population: A Mendelian Randomization Study
Source: Toxics. 2024 Mar 21;12(3):228. doi: 10.3390/toxics12030228 (PMC10974773; doi:10.3390/toxics12030228)
Supplement: Supplementary file 1 [file toxics-12-00228-s001.zip › TABLE S3.xlsx]

## Sheet: sheet1
Characteristics of the SNPs as the genetic instrument variables for PM2.5 correlated with the confounding factors for NAFLD or NAFLD directly at level p < 1E-5
SNP	chr	pos	effect allele	other allele	trait/disease	p
rs13429081	2	185963522	A	T	Qualifications: college or university degree	4e-06
rs56068671	6	50597378	G	T	Body mass index	1e-10
rs77205736	8	10153460	C	T	Body mass index	1e-06
rs78230389	8	35010055	A	G	Cause of death: other and unspecified cirrhosis of liver	3e-06
rs800507	8	116796539	G	T	Hip circumference	3e-13
rs987204	3	94242461	G	A	Body mass index	2e-13
rs10786736	10	104849116	C	G	Systolic blood pressure	1e-22
rs11855821	15	78008843	A	G	Body mass index	1e-12
rs12133063	1	91214714	A	C	Qualifications: college or university degree	7e-17
rs1217106	8	64567670	G	A	Cigarettes smoked per day	2e-16
rs1372504	5	103749428	A	G	Seen doctor for nerves, anxiety, tension or depression	9e-09
rs1537371	9	22099568	A	C	Diastolic blood pressure	1e-05
rs1933805	6	105353475	A	G	Hip circumference adjusted for BMI	1e-14
rs4933236	10	94498436	C	T	Type II diabetes	2e-07
rs6749467	2	343517	A	G	Comparative body size at age 10	9e-06
rs7093269	10	3458842	G	T	Waist circumference in males	8e-06
rs72805044	2	39974034	C	T	Cause of death: fatty liver	1e-06
rs7573056	2	58229428	C	A	BMI-adjusted waist circumference	2e-09
rs75738250	3	194880839	A	T	Body mass index	2e-06
rs80347400	17	46012502	G	A	Hip circumference adjusted for BMI	4e-14
rs8614	17	27588806	A	C	Educational attainment	3e-21
rs12203592	6	396321	T	C	Alcohol consumption	7e-10
rs9260734	6	29932666	A	G	Started insulin within one year diagnosis of diabetes	3e-08

## Sheet: sheet2
Characteristics of the SNPs as the genetic instrument variables for PM2.5 absorbance correlated with the confounding factors for NAFLD or NAFLD directly at level p < 1E-5
SNP	chr	pos	effect allele	other allele	trait/disease	p
rs1178424	6	151118800	A	G	High blood pressure	4e-09
rs150351	15	89930588	A	G	Insomnia	9e-06
rs2184061	9	22061562	A	C	Type II diabetes	5e-10
rs3740390	10	104638480	T	C	Systolic blood pressure	1e-24
rs3757541	7	121962454	G	A	Hip circumference	2e-09
rs59727727	6	31329797	C	T	Self-reported hypothyroidism or myxoedema	1e-30
rs62009152	15	78001011	C	T	Body mass index	8e-13
rs77205736	8	10153460	C	T	Body mass index	1e-06
rs77938042	6	50679830	A	C	Waist circumference	3e-08
rs12203592	6	396321	T	C	Alcohol consumption	7e-10
rs8046866	16	544664	A	G	Hip circumference	3e-07

## Sheet: sheet3
Characteristics of the SNPs as the genetic instrument variables for PM2.5-10 correlated with the confounding factors for NAFLD or NAFLD directly at level p < 1E-5
SNP	chr	pos	effect allele	other allele	trait/disease	p
rs1748399	1	36655652	T	C	Weight	3e-08
rs11621531	14	103577789	A	G	Smoked cigarette or pipe within last hour	8e-06
rs71323440	3	116072052	C	T	Treatment with duloxetine	7e-06

## Sheet: sheet4
Characteristics of the SNPs as the genetic instrument variables for PM10 correlated with the confounding factors for NAFLD or NAFLD directly at level p < 1E-5
SNP	chr	pos	effect allele	other allele	trait/disease	p
rs61780359	1	51766490	A	G	Treatment with glucose product	9e-06
rs150351	15	89930588	A	G	Insomnia	9e-06
rs146776068	3	47842610	A	G	Qualifications: college or university degree	4e-06
rs11621531	14	103577789	A	G	Smoked cigarette or pipe within last hour	8e-06
rs79037220	13	50507971	A	G	Treatment with coversyl plus 4mg or 1.25mg tablet	2e-06
rs2030237	2	58196110	A	G	High blood pressure	7e-06
rs12203592	6	396321	T	C	Alcohol consumption	7e-10
rs35695929	19	441111	T	C	Fibrosis and cirrhosis of liver	3e-06

## Sheet: sheet5
Characteristics of the SNPs as the genetic instrument variables for nitrogen dioxide correlated with the confounding factors for NAFLD or NAFLD directly at level p < 1E-5
SNP	chr	pos	effect allele	other allele	trait/disease	p
rs10116277	9	22081397	G	T	Long-standing illness, disability or infirmity	8e-07
rs10172295	2	58201202	A	G	High blood pressure	3e-06
rs10838511	11	45780039	T	C	Insomnia	5e-09
rs11204762	1	150999737	G	A	Waist-to-hip ratio adjusted for BMI	4e-08
rs12089815	1	91189933	A	G	Qualifications: college or university degree	4e-18
rs1217106	8	64567670	G	A	Cigarettes smoked per day	2e-16
rs12451892	17	2247982	C	T	Systolic blood pressure	2e-06
rs13429081	2	185963522	A	T	Qualifications: college or university degree	4e-06
rs1372504	5	103749428	A	G	Seen doctor for nerves, anxiety, tension or depression	9e-09
rs17688839	7	92263350	T	A	Hip circumference adjusted for BMI	6e-22
rs1897405	2	82085450	A	T	Types of physical activity in last 4 weeks: heavy diy	1e-06
rs243500	7	148439365	G	C	Weight	7e-06
rs2838761	21	46481557	A	G	Leg predicted mass right	2e-06
rs3740390	10	104638480	T	C	Predicted visceral adipose tissue	5e-11
rs6749467	2	343517	A	G	Comparative body size at age 10	9e-06
rs75359967	6	50491551	C	G	Body mass index	4e-08
rs76892360	5	7381172	C	T	Overall health rating	6e-06
rs77205736	8	10153460	C	T	Body mass index	1e-06
rs9368527	6	27679445	A	C	Self-reported hyperthyroidism or thyrotoxicosis	5e-07
rs12203592	6	396321	T	C	Alcohol consumption	7e-10
rs35745455	7	5824100	A	G	Educational attainment	1e-10

## Sheet: sheet6
SNPs as the genetic instrument variables for nitrogen oxides correlated with the confounding factors for NAFLD or NAFLD directly at level p < 1E-5
SNP	chr	pos	effect allele	other allele	trait/disease	p
rs10172295	2	58201202	A	G	High blood pressure	3e-06
rs10734177	11	88673032	A	C	Seen doctor for nerves, anxiety, tension or depression	9e-06
rs11855821	15	78008843	A	G	Body mass index	1e-12
rs12089815	1	91189933	A	G	Educational attainment	1e-69
rs1217106	8	64567670	G	A	Cigarettes smoked per day	2e-16
rs13429081	2	185963522	A	T	Qualifications: college or university degree	4e-06
rs1876281	8	25278509	C	T	Comparative height size at age 10	8e-06
rs1897405	2	82085450	A	T	Types of physical activity in last 4 weeks: heavy diy	1e-06
rs1906469	10	63006098	T	G	High blood pressure	2e-07
rs2242523	19	36231646	C	T	Qualifications: college or university degree	1e-06
rs2838761	21	46481557	A	G	Leg predicted mass right	2e-06
rs3740390	10	104638480	T	C	Predicted visceral adipose tissue	5e-11
rs4721275	7	13861710	C	T	Cause of death: ill-defined sites within the digestive system	5e-06
rs4933236	10	94498436	C	T	Type II diabetes	2e-07
rs6749467	2	343517	A	G	Comparative body size at age 10	9e-06
rs7169086	15	67934454	C	T	Body mass index	6e-11
rs7302816	12	89950320	A	C	Systolic blood pressure	4e-20
rs77205736	8	10153460	C	T	Body mass index	1e-06
rs78648104	6	50683009	C	T	Systolic blood pressure	1e-08
rs80347400	17	46012502	G	A	Hip circumference adjusted for BMI	4e-14
rs12203592	6	396321	T	C	Alcohol consumption	7e-10
rs8614	17	27588806	A	C	Educational attainment	3e-21
