# Supplementary material for: Investigation of the Association between Air Pollution and Non-Alcoholic Fatty Liver Disease in the European Population: A Mendelian Randomization Study
Source: Toxics. 2024 Mar 21;12(3):228. doi: 10.3390/toxics12030228 (PMC10974773; doi:10.3390/toxics12030228)
Supplement: Supplementary file 1 [file toxics-12-00228-s001.zip › TABLE S4.xlsx]

## Sheet: sheet1
MR original analytical results of air pollution on non-alcoholic fatty liver disease in the derivation dataset at level p < 5E-8
Exposure	GWAS ID	Method	OR	OR_low	OR_up	P	Number of SNPs	R^2	F Statistic Median (Min, Max)	P (Cochran’s Q heterogeneity test)	P (MR-Egger intercept test)	P (MR-PRESSO global test)
PM2.5	ukb-b-10817	MR Egger	218.912	0.829659	57761.7	0.13109	6	0.000154046	31.0(30.0,33.1)	0.0946168	0.230541	0.126667
		Weighted median	4.80575	0.829823	27.8315	0.0798034
		Inverse variance weighted	4.7522	0.746135	30.2672	0.0989464
		Simple mode	5.41598	0.336021	87.2946	0.287076
		Weighted mode	5.29572	0.377612	74.2683	0.270954
		IVW-mre	4.7522	0.746135	30.2672	0.0989464
		MR-RAPS	NA	NA	NA	NA
		MR-PRESSO（Raw）	4.7522	0.746135	30.2672	0.159859
		MR-PRESSO（Outlier-corrected）	NA	NA	NA	NA
PM2.5 absorbance	ukb-b-11312	MR Egger	4.57409	0.00701406	2982.92	0.690768	4	5.10701e-05	32.4(29.9,36.4)	0.0811011	0.776476	0.154667
		Weighted median	1.63343	0.221022	12.0717	0.630638
		Inverse variance weighted	1.76408	0.146213	21.284	0.655055
		Simple mode	0.247002	0.0028042	21.7566	0.583789
		Weighted mode	9.03199	0.199095	409.739	0.340389
		IVW-mre	1.76408	0.146213	21.284	0.655055
		MR-RAPS	NA	NA	NA	NA
		MR-PRESSO（Raw）	1.76408	0.146212	21.284	0.685336
		MR-PRESSO（Outlier-corrected）	NA	NA	NA	NA
PM2.5-10	ukb-b-12963	MR Egger	NA	NA	NA	NA	0	NA	NA	NA	NA	NA
		Weighted median	NA	NA	NA	NA
		Inverse variance weighted	NA	NA	NA	NA
		Simple mode	NA	NA	NA	NA
		Weighted mode	NA	NA	NA	NA
		IVW-mre	NA	NA	NA	NA
		MR-RAPS	NA	NA	NA	NA
		MR-PRESSO（Raw）	NA	NA	NA	NA
		MR-PRESSO（Outlier-corrected）	NA	NA	NA	NA
PM10	ukb-b-18469	MR Egger	NA	NA	NA	NA	0	NA	NA	NA	NA	NA
		Weighted median	NA	NA	NA	NA
		Inverse variance weighted	NA	NA	NA	NA
		Simple mode	NA	NA	NA	NA
		Weighted mode	NA	NA	NA	NA
		IVW-mre	NA	NA	NA	NA
		MR-RAPS	NA	NA	NA	NA
		MR-PRESSO（Raw）	NA	NA	NA	NA
		MR-PRESSO（Outlier-corrected）	NA	NA	NA	NA
Nitrogen dioxide	ukb-b-9942	MR Egger	15.3054	0.0884305	2649.03	0.347027	7	0.000131757	31.5(30.1,41.9)	0.556355	0.382668	0.552333
		Weighted median	2.11786	0.401904	11.1602	0.376166
		Inverse variance weighted	1.33768	0.373576	4.78992	0.654841
		Simple mode	2.45902	0.161461	37.4505	0.541225
		Weighted mode	2.52521	0.144791	44.0406	0.548805
		IVW-mre	1.33768	0.422271	4.23755	0.620916
		MR-RAPS	NA	NA	NA	NA
		MR-PRESSO（Raw）	1.33768	0.422271	4.23755	0.638501
		MR-PRESSO（Outlier-corrected）	NA	NA	NA	NA
Nitrogen oxides	ukb-b-12417	MR Egger	12.5392	0.00750407	20952.7	0.533787	7	0.000152165	31.0(29.8,34.3)	0.182669	0.527791	0.207667
		Weighted median	1.42072	0.22988	8.78041	0.70551
		Inverse variance weighted	1.02642	0.211178	4.98884	0.974216
		Simple mode	2.5028	0.150477	41.6275	0.546067
		Weighted mode	2.30867	0.131038	40.6749	0.588353
		IVW-mre	1.02642	0.211178	4.98884	0.974216
		MR-RAPS	NA	NA	NA	NA
		MR-PRESSO（Raw）	1.02642	0.211178	4.98884	0.975264
		MR-PRESSO（Outlier-corrected）	NA	NA	NA	NA

## Sheet: sheet2
MR analytical results of air pollution on non-alcoholic fatty liver disease in the derivation dataset at level p < 5E-8 without SNPs in Table S2
Exposure	GWAS ID	Method	OR	OR_low	OR_up	P	Number of SNPs	R^2	F Statistic Median (Min, Max)	P (Cochran’s Q heterogeneity test)	P (MR-Egger intercept test)	P (MR-PRESSO global test)
PM2.5	ukb-b-10817	MR Egger	NA	NA	NA	NA	2	1.37178e-05	30.1(30.0,30.1)	0.225383	NA	NA
		Weighted median	NA	NA	NA	NA
		Inverse variance weighted	37.5733	2.25717	625.453	0.0114907
		Simple mode	NA	NA	NA	NA
		Weighted mode	NA	NA	NA	NA
		IVW-mre	37.5733	2.25717	625.453	0.0114907
		MR-RAPS	NA	NA	NA	NA
		MR-PRESSO（Raw）	NA	NA	NA	NA
		MR-PRESSO（Outlier-corrected）	NA	NA	NA	NA
PM2.5 absorbance	ukb-b-11312	MR Egger	NA	NA	NA	NA	2	7.42587e-06	35.2(33.9,36.4)	0.130139	NA	NA
		Weighted median	NA	NA	NA	NA
		Inverse variance weighted	1.75787	0.0569635	54.2472	0.747152
		Simple mode	NA	NA	NA	NA
		Weighted mode	NA	NA	NA	NA
		IVW-mre	1.75787	0.0569635	54.2472	0.747152
		MR-RAPS	NA	NA	NA	NA
		MR-PRESSO（Raw）	NA	NA	NA	NA
		MR-PRESSO（Outlier-corrected）	NA	NA	NA	NA
PM2.5-10	ukb-b-12963	MR Egger	NA	NA	NA	NA	0	NA	NA	NA	NA	NA
		Weighted median	NA	NA	NA	NA
		Inverse variance weighted	NA	NA	NA	NA
		Simple mode	NA	NA	NA	NA
		Weighted mode	NA	NA	NA	NA
		IVW-mre	NA	NA	NA	NA
		MR-RAPS	NA	NA	NA	NA
		MR-PRESSO（Raw）	NA	NA	NA	NA
		MR-PRESSO（Outlier-corrected）	NA	NA	NA	NA
PM10	ukb-b-18469	MR Egger	NA	NA	NA	NA	0	NA	NA	NA	NA	NA
		Weighted median	NA	NA	NA	NA
		Inverse variance weighted	NA	NA	NA	NA
		Simple mode	NA	NA	NA	NA
		Weighted mode	NA	NA	NA	NA
		IVW-mre	NA	NA	NA	NA
		MR-RAPS	NA	NA	NA	NA
		MR-PRESSO（Raw）	NA	NA	NA	NA
		MR-PRESSO（Outlier-corrected）	NA	NA	NA	NA
Nitrogen dioxide	ukb-b-9942	MR Egger	29.9331	0.0878968	10193.7	0.371547	4	6.17646e-05	32.7(30.1,37.8)	0.880307	0.529369	0.889
		Weighted median	3.12507	0.495148	19.7235	0.225429
		Inverse variance weighted	3.49466	0.6453	18.9255	0.146569
		Simple mode	2.85422	0.23565	34.5708	0.470259
		Weighted mode	2.88128	0.202271	41.0426	0.49186
		IVW-mre	3.49466	1.57317	7.76304	0.00212152
		MR-RAPS	NA	NA	NA	NA
		MR-PRESSO（Raw）	3.49466	1.57317	7.76304	0.054448
		MR-PRESSO（Outlier-corrected）	NA	NA	NA	NA
Nitrogen oxides	ukb-b-12417	MR Egger	512.533	0.31227	841226	0.240364	4	6.48092e-05	30.1(29.8,34.3)	0.134492	0.221437	0.205667
		Weighted median	1.29723	0.140952	11.939	0.818247
		Inverse variance weighted	0.830456	0.0784907	8.78648	0.877328
		Simple mode	1.61279	0.0663839	39.1826	0.788171
		Weighted mode	1.57491	0.0714397	34.7192	0.79223
		IVW-mre	0.830456	0.0784907	8.78648	0.877328
		MR-RAPS	NA	NA	NA	NA
		MR-PRESSO（Raw）	0.830456	0.0784907	8.78649	0.887127
		MR-PRESSO（Outlier-corrected）	NA	NA	NA	NA

## Sheet: sheet3
MR original analytical results of air pollution on non-alcoholic fatty liver disease in the derivation dataset at level p < 1E-6
Exposure	GWAS ID	Method	OR	OR_low	OR_up	P	Number of SNPs	R^2	F Statistic Median (Min, Max)	P (Cochran’s Q heterogeneity test)	P (MR-Egger intercept test)	P (MR-PRESSO global test)
PM2.5	ukb-b-10817	MR Egger	4.06993	0.284492	58.2241	0.314124	21	0.000389235	27.0(24.1,33.1)	0.098864	0.767872	0.103
		Weighted median	3.94869	1.20956	12.8908	0.0228948
		Inverse variance weighted	2.78272	1.10989	6.97685	0.0290858
		Simple mode	6.72398	0.719085	62.8743	0.110325
		Weighted mode	6.18953	0.781602	49.0151	0.0996543
		IVW-mre	2.78272	1.10989	6.97685	0.0290858
		MR-RAPS	2.93375	1.31951	6.5228	0.00828761
		MR-PRESSO（Raw）	2.78272	1.10989	6.97685	0.0411835
		MR-PRESSO（Outlier-corrected）	NA	NA	NA	NA
PM2.5 absorbance	ukb-b-11312	MR Egger	3.00755	0.189179	47.8136	0.44924	15	0.000259402	28.1(23.9,36.4)	0.135107	0.477301	0.137333
		Weighted median	1.43356	0.375026	5.47987	0.598583
		Inverse variance weighted	1.16907	0.390073	3.50378	0.780292
		Simple mode	7.40262	0.430781	127.208	0.189345
		Weighted mode	7.40262	0.332317	164.899	0.226784
		IVW-mre	1.16907	0.390073	3.50378	0.780292
		MR-RAPS	1.17814	0.455483	3.04733	0.735284
		MR-PRESSO（Raw）	1.16907	0.390073	3.50378	0.78437
		MR-PRESSO（Outlier-corrected）	NA	NA	NA	NA
PM2.5-10	ukb-b-12963	MR Egger	0.219158	0.00850479	5.64742	0.401837	7	7.05159e-05	24.9(24.4,29.2)	0.935339	0.564625	0.937
		Weighted median	0.396079	0.073005	2.14887	0.283085
		Inverse variance weighted	0.552814	0.13925	2.19464	0.399444
		Simple mode	0.352192	0.0310444	3.99554	0.431977
		Weighted mode	0.334131	0.0256681	4.3495	0.434532
		IVW-mre	0.552814	0.258604	1.18175	0.12622
		MR-RAPS	NA	NA	NA	NA
		MR-PRESSO（Raw）	0.552814	0.258604	1.18175	0.177089
		MR-PRESSO（Outlier-corrected）	NA	NA	NA	NA
PM10	ukb-b-18469	MR Egger	0.120424	0.0066997	2.16458	0.224323	6	6.86888e-05	26.5(25.0,28.1)	0.922761	0.406156	0.928667
		Weighted median	0.306589	0.0497977	1.88758	0.20234
		Inverse variance weighted	0.390943	0.09009	1.69649	0.209779
		Simple mode	0.289495	0.0227761	3.67962	0.383141
		Weighted mode	0.289495	0.0233722	3.58577	0.378659
		IVW-mre	0.390943	0.179108	0.85332	0.0183592
		MR-RAPS	NA	NA	NA	NA
		MR-PRESSO（Raw）	0.390943	0.179108	0.85332	0.0648883
		MR-PRESSO（Outlier-corrected）	NA	NA	NA	NA
Nitrogen dioxide	ukb-b-9942	MR Egger	2.49777	0.0771503	80.8663	0.609798	31	0.000597522	25.5(23.9,41.9)	0.00776129	0.853628	0.00766667
		Weighted median	2.67829	0.923465	7.76776	0.0697644
		Inverse variance weighted	1.81549	0.750192	4.39357	0.18598
		Simple mode	7.19963	0.555212	93.3601	0.141523
		Weighted mode	5.90934	0.570977	61.1589	0.146668
		IVW-mre	1.81549	0.750192	4.39357	0.18598
		MR-RAPS	1.88754	0.947224	3.76133	0.0709381
		MR-PRESSO（Raw）	1.81549	0.750192	4.39357	0.195975
		MR-PRESSO（Outlier-corrected）	NA	NA	NA	NA
Nitrogen oxides	ukb-b-12417	MR Egger	1.40156	0.0963978	20.3777	0.80651	31	0.000569433	26.6(23.9,34.3)	0.0323747	0.894299	0.0376667
		Weighted median	1.50145	0.545836	4.13007	0.43113
		Inverse variance weighted	1.66797	0.736869	3.77561	0.219661
		Simple mode	0.270273	0.0212098	3.44404	0.321704
		Weighted mode	0.326601	0.0252536	4.22389	0.398336
		IVW-mre	1.66797	0.736869	3.77561	0.219661
		MR-RAPS	1.71728	0.869316	3.39239	0.119518
		MR-PRESSO（Raw）	1.66797	0.736869	3.77561	0.229206
		MR-PRESSO（Outlier-corrected）	NA	NA	NA	NA

## Sheet: sheet4
MR analytical results of air pollution on non-alcoholic fatty liver disease in the derivation dataset at level p < 1E-6 without SNPs in Table S2
Exposure	GWAS ID	Method	OR	OR_low	OR_up	P	Number of SNPs	R^2	F Statistic Median (Min, Max)	P (Cochran’s Q heterogeneity test)	P (MR-Egger intercept test)	P (MR-PRESSO global test)
PM2.5	ukb-b-10817	MR Egger	9.33379	0.250925	347.194	0.251407	13	0.000172248	26.0(24.1,30.1)	0.0274471	0.50428	0.03
		Weighted median	4.8343	1.03175	22.6512	0.0455358
		Inverse variance weighted	2.8839	0.733995	11.331	0.129255
		Simple mode	7.65098	0.358289	163.381	0.217081
		Weighted mode	6.9804	0.458639	106.24	0.187171
		IVW-mre	2.8839	0.733995	11.331	0.129255
		MR-RAPS	3.10714	1.12267	8.59938	0.0290512
		MR-PRESSO（Raw）	2.8839	0.733995	11.331	0.155149
		MR-PRESSO（Outlier-corrected）	NA	NA	NA	NA
PM2.5（Heterogeneous SNP-corrected）	ukb-b-10817	MR Egger	6.52501	0.260864	163.21	0.280097	12	0.000151894	25.9(24.1,30.1)	0.146973	0.783105	0.172667
		Weighted median	5.5941	1.27058	24.6297	0.0228066
		Inverse variance weighted	4.26317	1.24105	14.6446	0.0212794
		Simple mode	7.53922	0.464583	122.346	0.183092
		Weighted mode	6.93527	0.403211	119.287	0.209091
		IVW-mre	4.26317	1.24105	14.6446	0.0212794
		MR-RAPS	4.5857	1.5645	13.4411	0.00550766
		MR-PRESSO（Raw）	4.26317	1.24105	14.6446	0.0418113
		MR-PRESSO（Outlier-corrected）	NA	NA	NA	NA
PM2.5 absorbance	ukb-b-11312	MR Egger	2.10554	0.142971	31.0083	0.598243	13	0.000215758	26.8(23.9,36.4)	0.226527	0.606329	0.227333
		Weighted median	1.4451	0.344485	6.06214	0.614775
		Inverse variance weighted	1.0915	0.355088	3.35516	0.878541
		Simple mode	6.29311	0.421447	93.9697	0.207105
		Weighted mode	6.29311	0.326591	121.263	0.246399
		IVW-mre	1.0915	0.355088	3.35516	0.878541
		MR-RAPS	1.09576	0.391592	3.06615	0.86172
		MR-PRESSO（Raw）	1.0915	0.355088	3.35516	0.881081
		MR-PRESSO（Outlier-corrected）	NA	NA	NA	NA
PM2.5-10	ukb-b-12963	MR Egger	0.29498	0.0102354	8.50117	0.515824	6	6.30138e-05	24.8(24.4,29.2)	0.936016	0.609554	0.938333
		Weighted median	0.587741	0.0983083	3.51383	0.560205
		Inverse variance weighted	0.689381	0.153684	3.09235	0.627151
		Simple mode	0.385465	0.0283149	5.24753	0.506255
		Weighted mode	0.381216	0.0281698	5.1589	0.500625
		IVW-mre	0.689381	0.321695	1.47732	0.338812
		MR-RAPS	NA	NA	NA	NA
		MR-PRESSO（Raw）	0.689381	0.321695	1.47732	0.38274
		MR-PRESSO（Outlier-corrected）	NA	NA	NA	NA
PM10	ukb-b-18469	MR Egger	0.123773	0.00525035	2.91787	0.285724	5	6.53676e-05	26.9(25.5,28.1)	0.853788	0.438956	0.868667
		Weighted median	0.356473	0.0533193	2.38324	0.287286
		Inverse variance weighted	0.426383	0.08583	2.11817	0.297283
		Simple mode	0.341845	0.0255721	4.56975	0.462654
		Weighted mode	0.335164	0.0270118	4.15874	0.442826
		IVW-mre	0.426383	0.168344	1.07995	0.0722104
		MR-RAPS	NA	NA	NA	NA
		MR-PRESSO（Raw）	0.426383	0.168344	1.07995	0.146615
		MR-PRESSO（Outlier-corrected）	NA	NA	NA	NA
Nitrogen dioxide	ukb-b-9942	MR Egger	6.40139	0.0973624	420.879	0.394993	22	0.000381109	25.4(24.0,37.8)	0.00449255	0.601353	0.005
		Weighted median	2.82238	0.79983	9.9594	0.106785
		Inverse variance weighted	2.1516	0.696524	6.64643	0.183017
		Simple mode	11.2419	0.716938	176.278	0.0995769
		Weighted mode	7.38519	0.679661	80.2475	0.115328
		IVW-mre	2.1516	0.696524	6.64643	0.183017
		MR-RAPS	2.2796	1.00519	5.16974	0.0485646
		MR-PRESSO（Raw）	2.1516	0.696524	6.64643	0.197292
		MR-PRESSO（Outlier-corrected）	NA	NA	NA	NA
Nitrogen oxides	ukb-b-12417	MR Egger	3.47736	0.145105	83.333	0.451364	21	0.000352462	26.1(23.9,34.3)	0.0144124	0.642174	0.0136667
		Weighted median	1.34999	0.402238	4.53084	0.62712
		Inverse variance weighted	1.69655	0.575511	5.00126	0.337895
		Simple mode	0.456571	0.0232153	8.97931	0.61162
		Weighted mode	0.68465	0.050857	9.21694	0.778118
		IVW-mre	1.69655	0.575511	5.00126	0.337895
		MR-RAPS	1.75851	0.771577	4.00785	0.179267
		MR-PRESSO（Raw）	1.69655	0.575511	5.00126	0.349337
		MR-PRESSO（Outlier-corrected）	1.27431	0.48159	3.37187	0.630952

## Sheet: sheet5
MR original analytical results of air pollution on non-alcoholic fatty liver disease in the derivation dataset at level p < 1E-5
Exposure	GWAS ID	Method	OR	OR_low	OR_up	P	Number of SNPs	R^2	F Statistic Median (Min, Max)	P (Cochran’s Q heterogeneity test)	P (MR-Egger intercept test)	P (MR-PRESSO global test)
PM2.5	ukb-b-10817	MR Egger	0.946817	0.297265	3.0157	0.926535	93	0.00138009	21.3(19.6,33.1)	0.523663	0.193912	0.545
		Weighted median	1.94723	1.07735	3.51945	0.0273334
		Inverse variance weighted	1.95315	1.29931	2.93602	0.00128627
		Simple mode	2.23603	0.439955	11.3644	0.334528
		Weighted mode	2.23603	0.437192	11.4362	0.336388
		IVW-mre	1.95315	1.30355	2.92647	0.00117464
		MR-RAPS	1.28157	0.972583	1.68873	0.0779846
		MR-PRESSO（Raw）	1.95315	1.30355	2.92647	0.00163844
		MR-PRESSO（Outlier-corrected）	NA	NA	NA	NA
PM2.5 absorbance	ukb-b-11312	MR Egger	0.836584	0.283931	2.46494	0.747048	83	0.00110728	21.5(19.5,36.4)	0.585695	0.471531	0.589667
		Weighted median	1.04516	0.540513	2.02099	0.895537
		Inverse variance weighted	1.20557	0.781812	1.85902	0.39751
		Simple mode	1.03694	0.196042	5.48476	0.966057
		Weighted mode	1.00923	0.203813	4.9975	0.991042
		IVW-mre	1.20557	0.788925	1.84226	0.387507
		MR-RAPS	1.19003	0.757414	1.86973	0.450426
		MR-PRESSO（Raw）	1.20557	0.788925	1.84226	0.390028
		MR-PRESSO（Outlier-corrected）	NA	NA	NA	NA
PM2.5-10	ukb-b-12963	MR Egger	0.245065	0.0446959	1.34368	0.114017	38	0.000429869	21.5(19.6,29.2)	0.100761	0.114383	0.102
		Weighted median	0.959822	0.382168	2.41061	0.930449
		Inverse variance weighted	0.87823	0.424905	1.8152	0.72594
		Simple mode	1.41665	0.207633	9.66557	0.724236
		Weighted mode	1.37371	0.192775	9.78898	0.753096
		IVW-mre	0.87823	0.424905	1.8152	0.72594
		MR-RAPS	0.871305	0.449693	1.6882	0.683104
		MR-PRESSO（Raw）	0.87823	0.424905	1.8152	0.727928
		MR-PRESSO（Outlier-corrected）	NA	NA	NA	NA
PM10	ukb-b-18469	MR Egger	0.21271	0.0597175	0.757662	0.0207495	52	0.000538671	21.1(19.6,28.1)	0.892382	0.0806227	0.896333
		Weighted median	0.564777	0.264443	1.20621	0.140015
		Inverse variance weighted	0.602568	0.347244	1.04563	0.0716507
		Simple mode	0.442109	0.0769045	2.5416	0.36467
		Weighted mode	0.391473	0.0650246	2.35682	0.310687
		IVW-mre	0.602568	0.372314	0.975221	0.0391942
		MR-RAPS	0.58524	0.328652	1.04215	0.0687967
		MR-PRESSO（Raw）	0.602568	0.372314	0.975221	0.0443065
		MR-PRESSO（Outlier-corrected）	NA	NA	NA	NA
Nitrogen dioxide	ukb-b-9942	MR Egger	4.83928	1.49564	15.658	0.00975689	108	0.00148322	22.2(19.5,41.9)	0.0710934	0.123715	0.073
		Weighted median	1.8479	1.04441	3.26954	0.0349221
		Inverse variance weighted	2.03428	1.32645	3.11982	0.00113464
		Simple mode	1.33388	0.244087	7.28937	0.740176
		Weighted mode	1.41351	0.246701	8.09896	0.698365
		IVW-mre	2.03428	1.32645	3.11982	0.00113464
		MR-RAPS	2.06736	1.3802	3.09665	0.000426555
		MR-PRESSO（Raw）	2.03428	1.32645	3.11982	0.0015194
		MR-PRESSO（Outlier-corrected）	NA	NA	NA	NA
Nitrogen oxides	ukb-b-12417	MR Egger	1.01829	0.285398	3.63321	0.977771	117	0.00161957	21.5(19.5,34.3)	0.000164356	0.429675	0.000333333
		Weighted median	1.38396	0.765121	2.50333	0.282541
		Inverse variance weighted	1.64411	1.03565	2.61003	0.0349814
		Simple mode	0.706142	0.106955	4.66211	0.718517
		Weighted mode	0.730071	0.11984	4.44761	0.733529
		IVW-mre	1.64411	1.03565	2.61003	0.0349814
		MR-RAPS	1.7248	1.17516	2.53152	0.00536159
		MR-PRESSO（Raw）	1.64411	1.03565	2.61003	0.0371333
		MR-PRESSO（Outlier-corrected）	NA	NA	NA	NA

## Sheet: sheet6
MR analytical results of air pollution on non-alcoholic fatty liver disease in the derivation dataset at level p < 1E-5 without SNPs in Table S2
Exposure	GWAS ID	Method	OR	OR_low	OR_up	P	Number of SNPs	R^2	F Statistic Median (Min, Max)	P (Cochran’s Q heterogeneity test)	P (MR-Egger intercept test)	P (MR-PRESSO global test)
PM2.5	ukb-b-10817	MR Egger	1.07847	0.299839	3.87906	0.908246	72	0.000959515	21.1(19.6,30.1)	0.320671	0.316507	0.313333
		Weighted median	1.9354	0.984961	3.80295	0.0553613
		Inverse variance weighted	1.98517	1.22451	3.21834	0.00540863
		Simple mode	2.22772	0.308825	16.0698	0.429546
		Weighted mode	2.1684	0.3125	15.0462	0.43616
		IVW-mre	1.98517	1.22451	3.21834	0.00540863
		MR-RAPS	2.05516	1.25914	3.35442	0.00395346
		MR-PRESSO（Raw）	1.98517	1.22451	3.21834	0.00692198
		MR-PRESSO（Outlier-corrected）	NA	NA	NA	NA
PM2.5 absorbance	ukb-b-11312	MR Egger	0.851439	0.276544	2.62146	0.780056	73	0.000935894	21.4(19.5,36.4)	0.733274	0.544112	0.729333
		Weighted median	1.05691	0.552336	2.02244	0.86723
		Inverse variance weighted	1.17117	0.737773	1.85917	0.502765
		Simple mode	1.03301	0.174982	6.09832	0.971504
		Weighted mode	1.03301	0.184968	5.76909	0.970585
		IVW-mre	1.17117	0.757125	1.81165	0.477754
		MR-RAPS	1.15121	0.710499	1.86529	0.567395
		MR-PRESSO（Raw）	1.17117	0.757125	1.81165	0.480046
		MR-PRESSO（Outlier-corrected）	NA	NA	NA	NA
PM2.5-10	ukb-b-12963	MR Egger	0.293155	0.0480792	1.78746	0.192532	35	0.000387775	21.5(19.6,29.2)	0.0749847	0.184058	0.0753333
		Weighted median	0.981447	0.370432	2.60031	0.96995
		Inverse variance weighted	0.910614	0.419145	1.97835	0.813018
		Simple mode	1.47396	0.214968	10.1065	0.695337
		Weighted mode	1.43024	0.260969	7.83841	0.682723
		IVW-mre	0.910614	0.419145	1.97835	0.813018
		MR-RAPS	0.90516	0.454015	1.8046	0.777135
		MR-PRESSO（Raw）	0.910614	0.419145	1.97835	0.814437
		MR-PRESSO（Outlier-corrected）	NA	NA	NA	NA
PM10	ukb-b-18469	MR Egger	0.225612	0.0567025	0.897679	0.0404258	45	0.000475243	21.2(19.6,28.1)	0.751374	0.114915	0.751667
		Weighted median	0.663025	0.294733	1.49152	0.32048
		Inverse variance weighted	0.628494	0.347888	1.13544	0.123785
		Simple mode	0.565644	0.0825219	3.8772	0.564754
		Weighted mode	0.463107	0.0806611	2.65888	0.392651
		IVW-mre	0.628494	0.364518	1.08364	0.0947208
		MR-RAPS	0.608612	0.328428	1.12782	0.114612
		MR-PRESSO（Raw）	0.628494	0.364518	1.08364	0.10182
		MR-PRESSO（Outlier-corrected）	NA	NA	NA	NA
Nitrogen dioxide	ukb-b-9942	MR Egger	5.63442	1.58214	20.0656	0.00910084	89	0.00108082	22.1(19.5,37.8)	0.0275905	0.0987353	0.0313333
		Weighted median	1.76357	0.924471	3.36427	0.0851277
		Inverse variance weighted	2.07565	1.26848	3.39646	0.00365472
		Simple mode	1.32583	0.20924	8.40098	0.765338
		Weighted mode	1.40725	0.198618	9.97063	0.733178
		IVW-mre	2.07565	1.26848	3.39646	0.00365472
		MR-RAPS	2.16915	1.38562	3.39572	0.000708363
		MR-PRESSO（Raw）	2.07565	1.26848	3.39646	0.0046232
		MR-PRESSO（Outlier-corrected）	NA	NA	NA	NA
Nitrogen oxides	ukb-b-12417	MR Egger	1.39578	0.374791	5.19812	0.620299	96	0.00121947	21.4(19.5,34.3)	0.000764437	0.957848	0.000666667
		Weighted median	1.16583	0.630391	2.15606	0.624761
		Inverse variance weighted	1.44224	0.866221	2.40128	0.159172
		Simple mode	0.701134	0.111082	4.42545	0.706486
		Weighted mode	0.725133	0.129686	4.05454	0.715191
		IVW-mre	1.44224	0.866221	2.40128	0.159172
		MR-RAPS	1.50524	0.983713	2.30327	0.0595196
		MR-PRESSO（Raw）	1.44224	0.866221	2.40128	0.162436
		MR-PRESSO（Outlier-corrected）	NA	NA	NA	NA

## Sheet: Sheet7
Bias, Type 1 error rate for Mendelian randomization with sample overlap and power in the derivation dataset
Exposure	GWAS ID	Overlap proportion	Using specified value of concentration parameter		Using conservative value of concentration parameter		Power
			bias	Type 1 error rate	bias	Type 1 error rate
PM2.5	ukb-b-10817	0.89191	0.019	0.05	0.025	0.05	0.307
PM2.5 absorbance	ukb-b-11312	-	-	-	-	-	0.052
PM2.5-10	ukb-b-12963	0.89191	0.002	0.05	0.003	0.05	0.033
PM10	ukb-b-18469	0.89191	0.032	0.05	0.046	0.05	0.103
Nitrogen dioxide	ukb-b-9942	0.828231	0.041	0.05	0.052	0.05	0.377
Nitrogen oxides	ukb-b-12417	0.828231	0.017	0.05	0.022	0.05	0.139

## Sheet: sheet8
MR analytical results of air pollution on non-alcoholic fatty liver disease in the validation datasets at level p < 1 × 10-5 without SNPs in Table S2
Exposures	Gwas ID	Outcome	Gwas ID	Method	OR	OR_low	OR_up	P	Number of SNPs	R^2	F Statistic Median (Min, Max)	P (Cochran’s Q heterogeneity test)	P (MR-Egger intercept test)	P (MR-PRESSO global test)
PM2.5	ukb-b-10817	NAFLD	finn-b-NAFLD	MR Egger	1.17567	0.286619	4.82242	0.82282	74	0.000885695	21.0(19.6,35.1)	0.723447	0.647674	0.728667
				Weighted median	1.41373	0.336737	5.93534	0.636207
				Inverse variance weighted	0.906182	0.379899	2.16154	0.824226
				Simple mode	0.324013	0.0234928	4.46879	0.402669
				Weighted mode	1.26488	0.309893	5.16281	0.744268
				IVW-mre	0.906182	0.397884	2.06383	0.814523
				MR-RAPS	0.903	0.362581	2.2489	0.82652
				MR-PRESSO（Raw）	0.906182	0.397884	2.06383	0.81518
				MR-PRESSO（Outlier-corrected）	NA	NA	NA	NA
PM2.5	ukb-b-10817	NAFLD	ebi-a-GCST90091033	MR Egger	1.65851	0.611465	4.49846	0.324198	64	0.000865281	21.0(19.6,30.1)	0.541613	0.218717	0.537333
				Weighted median	0.884662	0.501005	1.56211	0.6727
				Inverse variance weighted	0.926872	0.626643	1.37094	0.703767
				Simple mode	0.82166	0.209745	3.2188	0.778898
				Weighted mode	0.739493	0.207233	2.63882	0.64355
				IVW-mre	0.926872	0.63023	1.36314	0.699595
				MR-RAPS	0.923756	0.612397	1.39342	0.705322
				MR-PRESSO（Raw）	0.926872	0.63023	1.36314	0.700895
				MR-PRESSO（Outlier-corrected）	NA	NA	NA	NA
Nitrogen dioxide	ukb-b-9942	NAFLD	finn-b-NAFLD	MR Egger	1.13326	0.221604	5.79541	0.880924	87	0.00102105	22.2(19.5,37.8)	0.350318	0.764361	0.348667
				Weighted median	2.08866	0.467518	9.33119	0.334835
				Inverse variance weighted	0.91998	0.374478	2.26012	0.855683
				Simple mode	0.237988	0.0110435	5.12864	0.362027
				Weighted mode	1.76518	0.353379	8.81738	0.490522
				IVW-mre	0.91998	0.374478	2.26012	0.855683
				MR-RAPS	0.916628	0.366307	2.29372	0.852428
				MR-PRESSO（Raw）	0.91998	0.374478	2.26012	0.856111
				MR-PRESSO（Outlier-corrected）	NA	NA	NA	NA
Nitrogen dioxide	ukb-b-9942	NAFLD	ebi-a-GCST90091033	MR Egger	2.01182	0.730656	5.53942	0.18	81	0.00101349	22.0(19.5,37.8)	0.257405	0.103375	0.248667
				Weighted median	0.916975	0.538473	1.56153	0.749631
				Inverse variance weighted	0.911567	0.62523	1.32904	0.630295
				Simple mode	0.692945	0.151791	3.16337	0.637167
				Weighted mode	0.662081	0.161096	2.72105	0.569029
				IVW-mre	0.911567	0.62523	1.32904	0.630295
				MR-RAPS	0.907489	0.622978	1.32194	0.613003
				MR-PRESSO（Raw）	0.911567	0.62523	1.32904	0.631609
				MR-PRESSO（Outlier-corrected）	NA	NA	NA	NA
